# Supplementary material for: Pentagram-type Ln15 (Ln = Dy, Tb, Eu, Sm, Ho) clusters with different anion templates: magnetic and luminescence properties
Source: Royal Society of Chemistry journal article supplement (doi:10.1039/d2dt02712g), 2022-01-01
Supplement: d2dt02712g1.pdf [file d2dt02712g1.pdf]

**Electronic Supplementary Information (ESI)**

**The pentagram-typed Ln<sub>15</sub> (Ln=Dy, Tb, Eu, Sm, Ho) clusters  
with different anion templates: magnetic and luminescent  
properties**

**Ying Zou,<sup>a</sup> Wei Lv,<sup>a</sup> Zhe Xue, Jie Pan,<sup>a</sup> Xiao-Yu Li,<sup>\*a</sup> and Guo-Ming Wang<sup>a</sup>**

*<sup>a</sup>College of Chemistry and Chemical Engineering, Qingdao University, Shandong  
266071, P. R. China.*

## Scheme S1: The syntheses route for clusters 1-5.

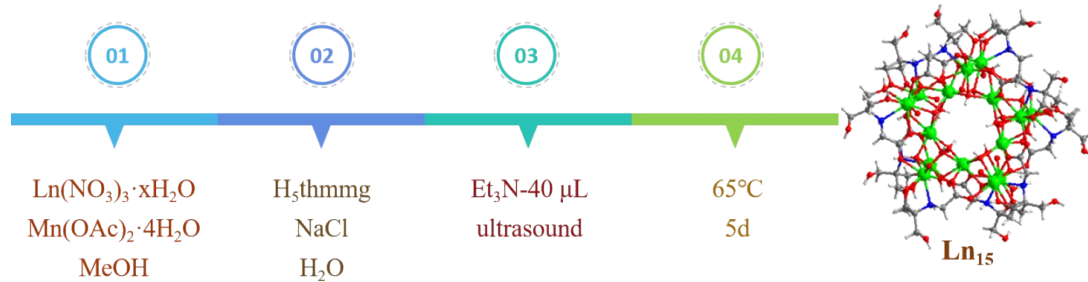

**Fig. S1: The coordination modes of  $H_4thmmg^-$  ligand in clusters 1-5.**

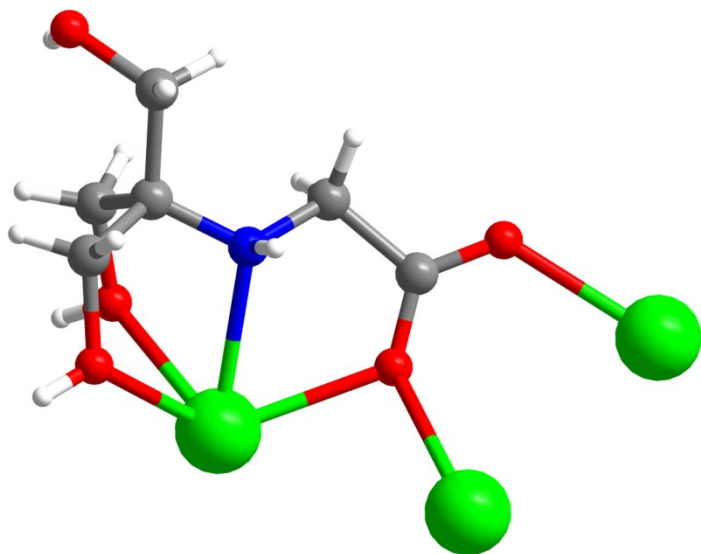

**Fig. S2: The molecule packing of 1.**

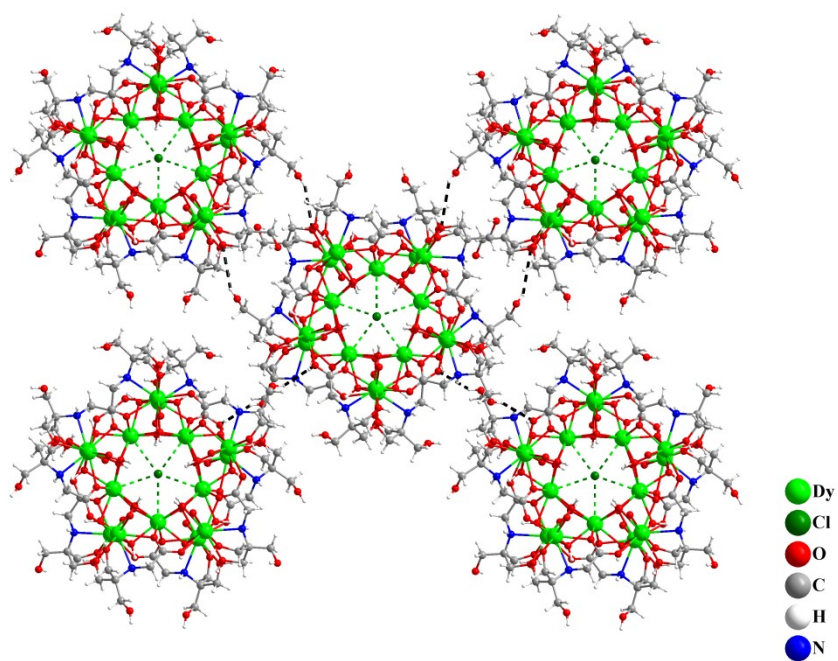

**Fig. S3: The molecular and packing structures of 2-5.**

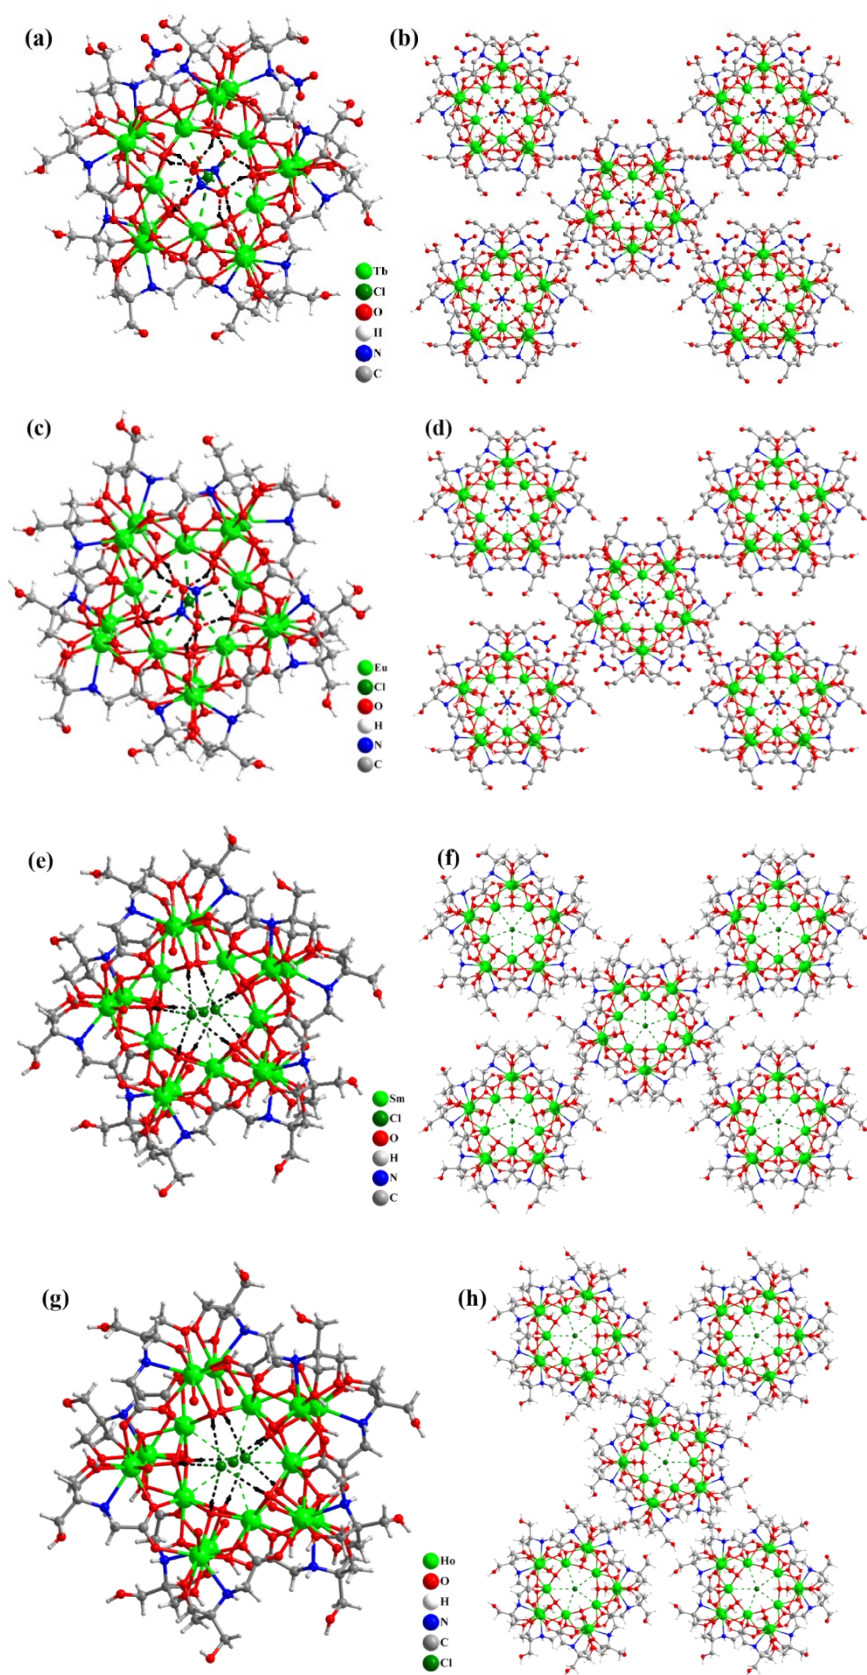

**Table S1: The reported Ln<sub>15</sub> clusters**

| Structure                                                                           | Chemical formula                                                                                                                                                                  | Ligands     | Anion<br>templat<br>e             | cite                                         |
|-------------------------------------------------------------------------------------|-----------------------------------------------------------------------------------------------------------------------------------------------------------------------------------|-------------|-----------------------------------|----------------------------------------------|
| 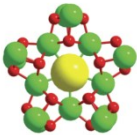   | $[\text{Nd}_{15}(\mu_5\text{-Cl})(\mu_3\text{-OH})_{20}(\text{His})_{10}(\text{H-His})_5(\text{H}_2\text{O})_9]$<br>$\text{Cl}_4(\text{ClO}_4)_{10} \cdot 16\text{H}_2\text{O}$   | L-histidine | $\text{Cl}^-$<br>$\text{ClO}_4^-$ | <i>Inorg. Chem. Front.</i> 2021,<br>8, 26–34 |
|                                                                                     | $[\text{Gd}_{15}(\mu_5\text{-Cl})(\mu_3\text{-OH})_{20}(\text{His})_{10}(\text{H-His})_4(\text{H}_2\text{O})_8]$<br>$\text{Cl}_6(\text{ClO}_4)_8 \cdot 22\text{H}_2\text{O}$      |             |                                   |                                              |
|                                                                                     | $[\text{Er}_{15}(\mu_5\text{-Cl})(\mu_3\text{-OH})_{20}(\text{His})_{10}(\text{H-His})_4(\text{H}_2\text{O})_6]$<br>$\text{Cl}_4(\text{ClO}_4)_{10} \cdot 20\text{H}_2\text{O}$   |             |                                   |                                              |
|  | $[\text{Nd}_{15}(\mu_5\text{-Br})(\mu_3\text{-OH})_{20}(\text{His})_{10}(\text{H-His})_5(\text{H}_2\text{O})_{12}]$<br>$\text{Br}_3(\text{ClO}_4)_{11} \cdot 9\text{H}_2\text{O}$ | L-histidine | $\text{Br}^-$<br>$\text{ClO}_4^-$ | <i>Inorg. Chem. Front.</i> 2021,<br>8, 26–34 |
|                                                                                     | $[\text{Gd}_{15}(\mu_5\text{-Br})(\mu_3\text{-OH})_{20}(\text{His})_{10}(\text{H-His})_5(\text{H}_2\text{O})_6]$<br>$\text{Br}_4(\text{ClO}_4)_{10} \cdot 27\text{H}_2\text{O}$   |             |                                   |                                              |
|                                                                                     | $[\text{Er}_{15}(\mu_5\text{-Br})(\mu_3\text{-OH})_{20}(\text{His})_{10}(\text{H-His})_4(\text{H}_2\text{O})_6]$<br>$\text{Br}_4(\text{ClO}_4)_{10} \cdot 24\text{H}_2\text{O}$   |             |                                   |                                              |

|                                                                                     |                                                                                                                                                                                                            |            |                                                  |                                             |
|-------------------------------------------------------------------------------------|------------------------------------------------------------------------------------------------------------------------------------------------------------------------------------------------------------|------------|--------------------------------------------------|---------------------------------------------|
|                                                                                     | H <sub>2</sub> O                                                                                                                                                                                           |            |                                                  |                                             |
| 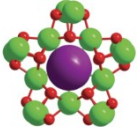   | $[\text{Nd}_{15}(\mu_5\text{-I})_{0.5}(\mu_5\text{-OH})_{0.5}(\mu_3\text{-OH})_{20}(\text{His})_{11}(\text{H-His})_4(\text{H}_2\text{O})_9]$<br>$\text{I}(\text{ClO}_4)_{12} \cdot 12\text{H}_2\text{O}$   |            | I <sup>-</sup><br>ClO <sub>4</sub> <sup>-</sup>  |                                             |
|                                                                                     | $[\text{Nd}_{15}(\mu_5\text{-I})_{0.5}(\mu_5\text{-OH})_{0.5}(\mu_3\text{-OH})_{20}(\text{His})_{10}(\text{H-His})_4(\text{H}_2\text{O})_9]$<br>$\text{I}_4(\text{ClO}_4)_{10} \cdot 12\text{H}_2\text{O}$ |            |                                                  |                                             |
|  | $[\text{Eu}_{15}(\mu_3\text{-OH})_{20}(\mu_5\text{-Cl})(\mu_3\text{-Tyr})_{10}(\text{OH})_2(\mu_2\text{-H}_2\text{O})_5(\text{H}_2\text{O})_{18}](\text{ClO}_4)_{12} \cdot 9\text{H}_2\text{O}$            | L-Tyrosine | Cl <sup>-</sup><br>ClO <sub>4</sub> <sup>-</sup> | <i>Inorg. Chem.</i><br>2002, 41,<br>278–286 |
|                                                                                     | $[\text{Nd}_{15}(\mu_3\text{-OH})_{20}(\mu_5\text{-Cl})(\mu_3\text{-Tyr})_{10}(\text{OH})_3(\mu_2\text{-H}_2\text{O})(\text{H}_2\text{O})_{23}]\text{Cl}_3(\text{ClO}_4)_8 \cdot 2\text{H}_2\text{O}$      |            |                                                  |                                             |
|                                                                                     | $[\text{Gd}_{15}(\mu_3\text{-OH})_{20}(\mu_5\text{-Cl})(\mu_3\text{-Tyr})_{10}(\text{OH})(\mu_2\text{-H}_2\text{O})_5(\text{H}_2\text{O})_{19}](\text{ClO}_4)_{13} \cdot 12\text{H}_2\text{O}$             |            |                                                  |                                             |
|  | $[\text{Pr}_{15}(\mu_3\text{-OH})_{20}(\mu_5\text{-Br})(\mu_3\text{-Tyr})_{10}(\mu_2\text{-TyrH})_2(\mu_2\text{-H}_2\text{O})_3(\text{H}_2\text{O})_{20}](\text{ClO}_4)_{14} \cdot 8\text{H}_2\text{O}$    |            | Br <sup>-</sup><br>ClO <sub>4</sub> <sup>-</sup> |                                             |
|                                                                                     | $[\text{Eu}_{15}(\mu_3\text{-OH})_{20}(\mu_5\text{-Br})(\mu_3\text{-Tyr})_{10}(\mu_2\text{-H}_2\text{O})_3(\text{H}_2\text{O})_{20}](\text{ClO}_4)_{14} \cdot 8\text{H}_2\text{O}$                         |            |                                                  |                                             |

|                                                                                     |                                                                                                                                                                                                     |                                                                                                 |                                   |                                                  |
|-------------------------------------------------------------------------------------|-----------------------------------------------------------------------------------------------------------------------------------------------------------------------------------------------------|-------------------------------------------------------------------------------------------------|-----------------------------------|--------------------------------------------------|
|                                                                                     | $\text{H}_2\text{O})_5(\text{H}_2\text{O})_{20}](\text{ClO}_4)_{14} \cdot 2\text{H}_2\text{O}$                                                                                                      |                                                                                                 |                                   |                                                  |
| 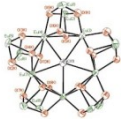   | $[\text{Eu}_{15}(\text{Cl})(\mu_3\text{-Tyr})_{10}(\mu_3\text{-OH})_{20}(\mu_2\text{-H}_2\text{O})_5(\text{OH})_{12}(\text{H}_2\text{O})_8][\text{ClO}_4]_2 \cdot 56\text{H}_2\text{O}$             | L-Tyrosine                                                                                      | $\text{Cl}^-$<br>$\text{ClO}_4^-$ | <i>Angew. Chem. Int. Ed.</i> 1999, 38, 1813-1815 |
|    | $[\text{Gd}_{15}(\mu_5\text{-Cl})(\text{OH})_{20}(\text{dmp})_{10}(\text{H}_2\text{O})_{10}](\text{ClO}_4)_8\text{Cl}_6$                                                                            | 2,2-dimethylolpropionic acid                                                                    | $\text{Cl}^-$                     | <i>J. Am. Chem. Soc.</i> 2017, 139, 16405-16411  |
|  | $[\text{Er}_{15}(\mu_5\text{-Cl})(\mu_3\text{-OH})_{20}(\text{DMPA})_{12}(\text{H}_2\text{O})_6] \cdot (\text{ClO}_4)_{13}(\text{H}_2\text{O})_{24}$                                                | 2,2-dimethylolpropionic acid                                                                    | $\text{Cl}^-$                     | <i>Inorg. Chem.</i> 2017, 56, 12821-12829        |
|  | $[\{\text{Y}_{15}(\text{OH})_{20}(\text{PepCO}_2)_{10}(\text{DBM})_{10}\text{Cl}\}\text{Cl}_4]$<br>$[\{\text{Dy}_{15}(\text{OH})_{20}(\text{PepCO}_2)_{10}(\text{DBM})_{10}\text{Cl}\}\text{Cl}_4]$ | (PepCO <sub>2</sub> =2-butoxycarbonyl)amino)methylbenzyl} amino]acetate, DBM=dibenzoylmethanide | $\text{Cl}^-$                     | <i>Chem. Eur. J.</i> 2015, 21, 2813-2820         |
|  | $[\text{Eu}_{15}(\mu_3\text{-OH})_{20}(\text{PepCO}_2)_{10}(\text{DBM})_{10}\text{Cl}]\text{Cl}_4$<br>$[\text{Tb}_{15}(\mu_3\text{-OH})_{20}(\text{PepCO}_2)_{10}(\text{DBM})_{10}$                 |                                                                                                 |                                   | <i>J. Am. Chem. Soc.</i> 2013, 135, 7454-7457    |



|  |                         |  |  |  |
|--|-------------------------|--|--|--|
|  | $\text{Cl}]\text{Cl}_4$ |  |  |  |
|--|-------------------------|--|--|--|

**Fig. S4:** The emission and excitation spectra of the powder samples of **2** and **3** under room temperature.

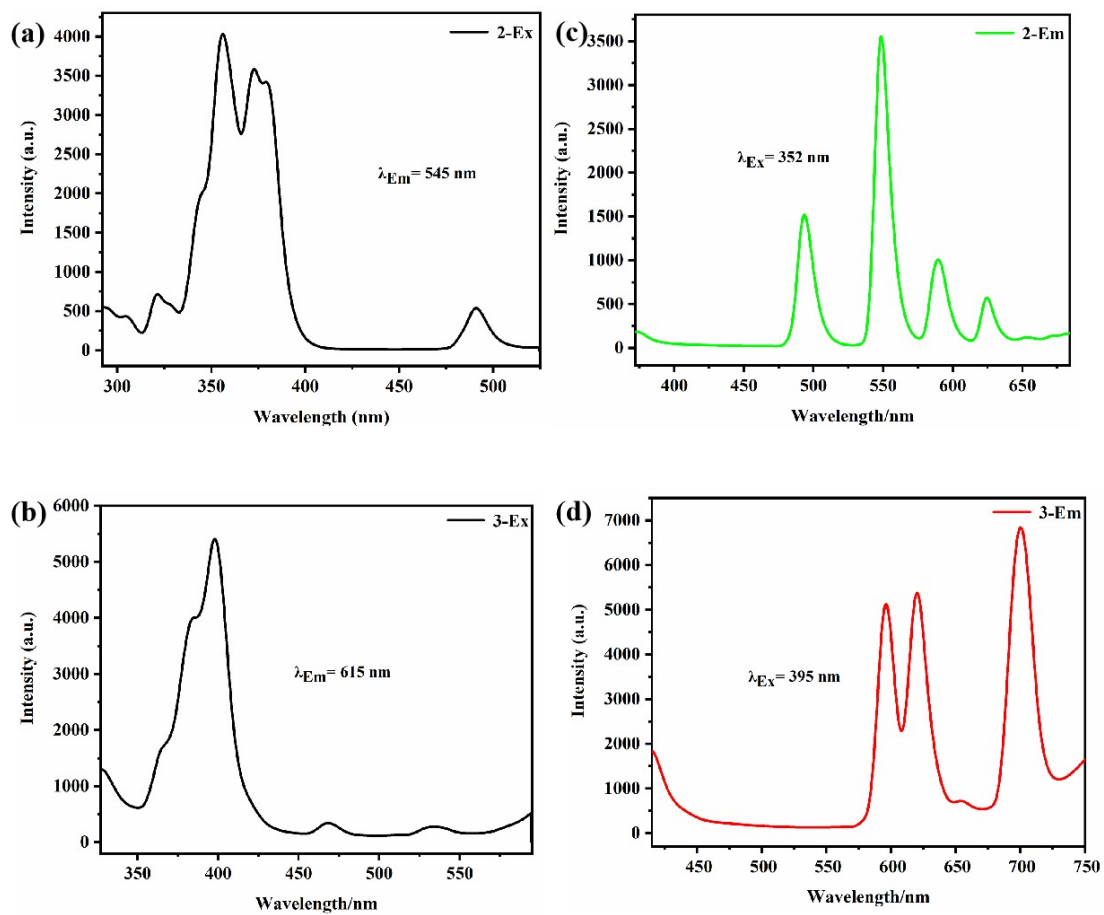

**Fig. S5: CIE chromatic coordinates of 2 and 3.**

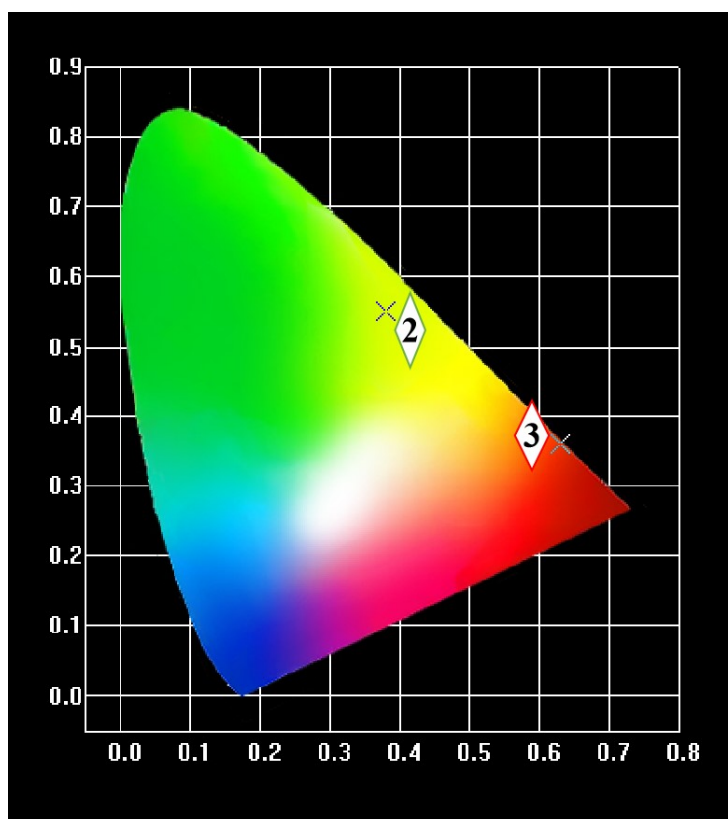

**Table S2: The corresponding chromaticity coordinates of 2 and 3.**

|      | 2      |        | 3      |        |
|------|--------|--------|--------|--------|
|      | x      | y      | x      | y      |
| 300K | 0.3816 | 0.5496 | 0.6363 | 0.3601 |
| 270K | 0.3806 | 0.5516 | 0.635  | 0.3612 |
| 240K | 0.3793 | 0.5517 | 0.6345 | 0.3616 |
| 210K | 0.3792 | 0.5534 | 0.6339 | 0.3624 |
| 180K | 0.3793 | 0.5539 | 0.6335 | 0.3627 |
| 150K | 0.3786 | 0.5542 | 0.6331 | 0.3632 |
| 120K | 0.378  | 0.5551 | 0.6329 | 0.3634 |
| 90K  | 0.3767 | 0.5561 | 0.6328 | 0.3634 |

**Fig. S6: The linear fitting plots of maximum emission intensity vs. temperature of 2(a) and 3(b) in the range of 120 - 300 K.**

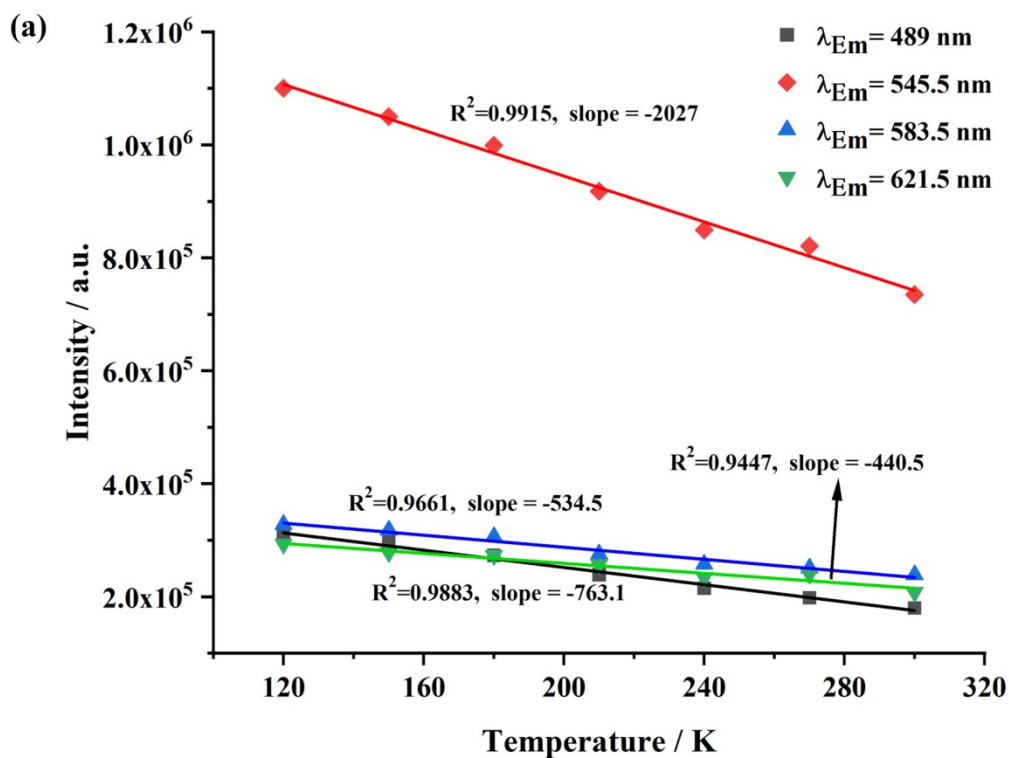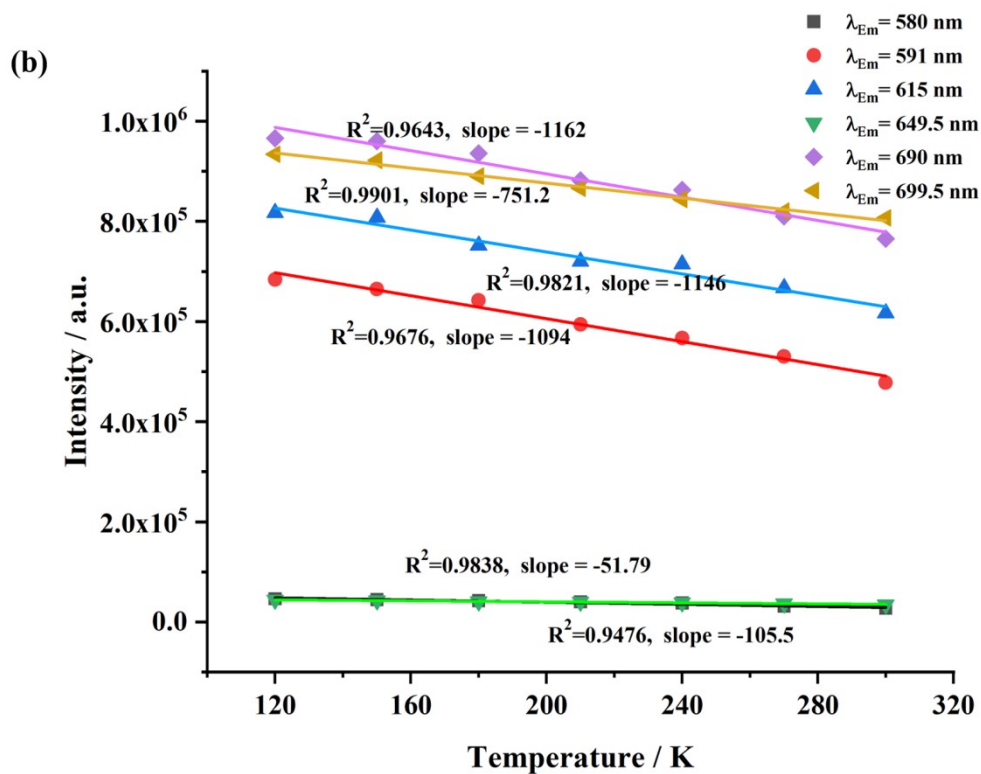

**Table S3: The comparison of quantum yields and luminescent lifetimes with other Tb/Eu clusters.**

| Tb cluster       | quantum yield | luminescent lifetime | cite                                                      |
|------------------|---------------|----------------------|-----------------------------------------------------------|
| Tb <sub>2</sub>  | 47.1%         | 1072 $\mu$ s         | <i>Adv. Optical Mater.</i> 2022, 10, 2102267              |
| Tb <sub>4</sub>  | 53%           | 1330 $\mu$ s         | <i>ACS Appl. Mater. Interfaces.</i> 2022, 14, 37894–37903 |
| Tb <sub>5</sub>  | -             | 1440 $\mu$ s         | <i>Polyhedron.</i> 2016, 106, 44–50                       |
| Tb <sub>6</sub>  | 17%           | -                    | <i>Cryst. Growth Des.</i> 2012, 12, 970–974               |
| Tb <sub>6</sub>  | 20.3%         | 18.63 $\mu$ s        | <i>Cryst. Growth Des.</i> 2018, 18, 1020–1029             |
| Tb <sub>7</sub>  | -             | 1441.8 $\mu$ s       | <i>Eur. J. Inorg. Chem.</i> 2017, 2700–2706               |
| Tb <sub>9</sub>  | 8.1%          | 108.21 $\mu$ s       | <i>Cryst. Growth Des.</i> 2018, 18, 1020–1029             |
| Tb <sub>12</sub> | 0.39%         | 1.26 ns              | <i>Inorg. Chem.</i> 2022, 61, 9385–9391                   |
| Tb <sub>14</sub> | -             | 797 $\mu$ s          | <i>Chem. Commun.</i> 2002, 368-369                        |
| Tb <sub>15</sub> | <3%           | -                    | <i>J. Am. Chem. Soc.</i> 2013, 135, 7454–7457             |
| Tb <sub>17</sub> | 8.76%         | 1290 $\mu$ s         | <i>Inorg. Chem.</i> 2016, 55, 2037–2047                   |
| Tb <sub>20</sub> | -             | 605 $\mu$ s          | <i>Chem. Eur. J.</i> 2013, 19, 12254–12258                |
| Tb <sub>48</sub> | 3.11%         | 875 $\mu$ s          | <i>Cryst. Growth Des.</i> 2020, 20, 5294–5301             |
| Tb <sub>15</sub> | 58.05%        | 934 $\mu$ s          | This work                                                 |

| Eu cluster       | quantum yield                                                                        | luminescent lifetime | cite                                                      |
|------------------|--------------------------------------------------------------------------------------|----------------------|-----------------------------------------------------------|
| Eu <sub>2</sub>  | 61.3%                                                                                | 424 μs               | <i>Adv. Optical Mater.</i> 2022, 10, 2102267              |
| Eu <sub>4</sub>  | 0.86%                                                                                | 25.07 ns             | <i>ACS Appl. Mater. Interfaces.</i> 2022, 14, 37894–37903 |
| Eu <sub>4</sub>  | 9.3%(CH <sub>3</sub> CN),<br>4.0%(CH <sub>3</sub> OH),<br>6.5%(CH <sub>3</sub> OD)   | -                    | <i>Inorg. Chem.</i> 2007, 46, 7050–7054                   |
| Eu <sub>8</sub>  | 12.6%(CH <sub>3</sub> CN),<br>7.1%(CH <sub>3</sub> OH),<br>13.5%(CH <sub>3</sub> OD) | -                    |                                                           |
| Eu <sub>5</sub>  | 25%                                                                                  | 660 μs               | <i>Polyhedron.</i> 2016, 106, 44–50                       |
| Eu <sub>6</sub>  | < 10 <sup>-3</sup>                                                                   | -                    | <i>Cryst. Growth Des.</i> 2012, 12, 970–974               |
| Eu <sub>6</sub>  | 13.4%                                                                                | 35.76 μs             | <i>Cryst. Growth Des.</i> 2018, 18, 1020–1029             |
| Eu <sub>7</sub>  | -                                                                                    | 580.4 μs             | <i>Eur. J. Inorg. Chem.</i> 2017, 2700–2706               |
| Eu <sub>9</sub>  | -                                                                                    | 5.6 μs               | <i>Cryst. Growth Des.</i> 2018, 18, 1020–1029             |
| Eu <sub>9</sub>  | 11.6-19.8%                                                                           | 300-510 μs           | <i>Inorg. Chem.</i> 2013, 52, 13332–13340                 |
| Eu <sub>12</sub> | -                                                                                    | 120 μs               | <i>Dalton Trans.</i> 2019, 48, 1700–1708                  |
| Eu <sub>14</sub> | -                                                                                    | 345 μs               | <i>Chem. Commun.</i> 2002, 368-369                        |
| Eu <sub>15</sub> | 16%                                                                                  | -                    | <i>J. Am. Chem. Soc.</i> 2013, 135,                       |

|                  |        |               |                                                  |
|------------------|--------|---------------|--------------------------------------------------|
|                  |        |               | 7454–7457                                        |
| Eu <sub>16</sub> | 12.8%  | 361 $\mu$ s   | <i>J. Am. Chem. Soc.</i> 2022, 144,<br>5653–5660 |
| Eu <sub>33</sub> | 10.04% | 194.7 $\mu$ s | <i>Inorg. Chem.</i> 2022, 61, 8861–8869          |
| Eu <sub>48</sub> | 8.40%  | 287 $\mu$ s   | <i>Cryst. Growth Des.</i> 2020, 20,<br>5294–5301 |
| Eu <sub>15</sub> | 17.34% | 242 $\mu$ s   | This work                                        |

**Fig. S7: (a)**The in- and out-of-phase ac susceptibilities for **1** under the zero dc field with different frequencies. **(b)** The  $\ln(\chi''/\chi')$ - $1/T$  plot of **1** and the gray lines represent the fitting results.

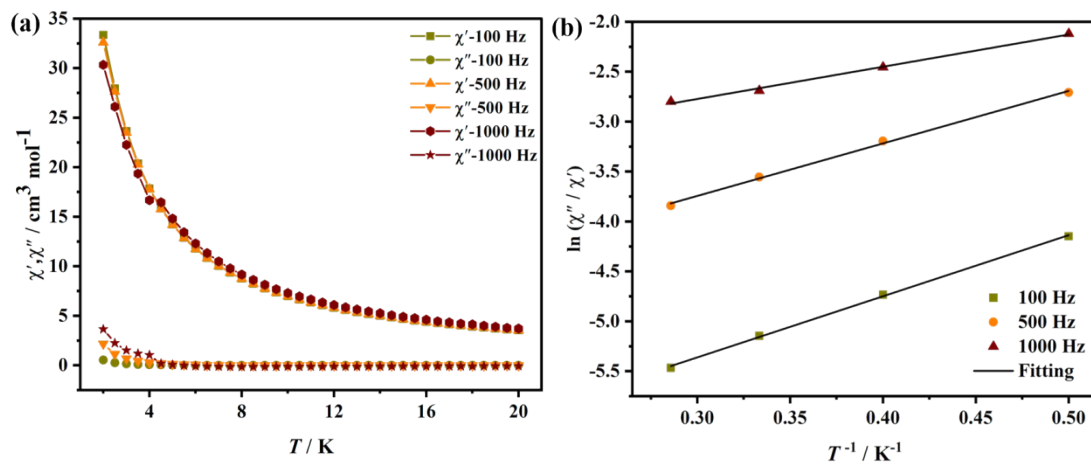



**Fig. S8: The compared IR spectra of 1-5.**

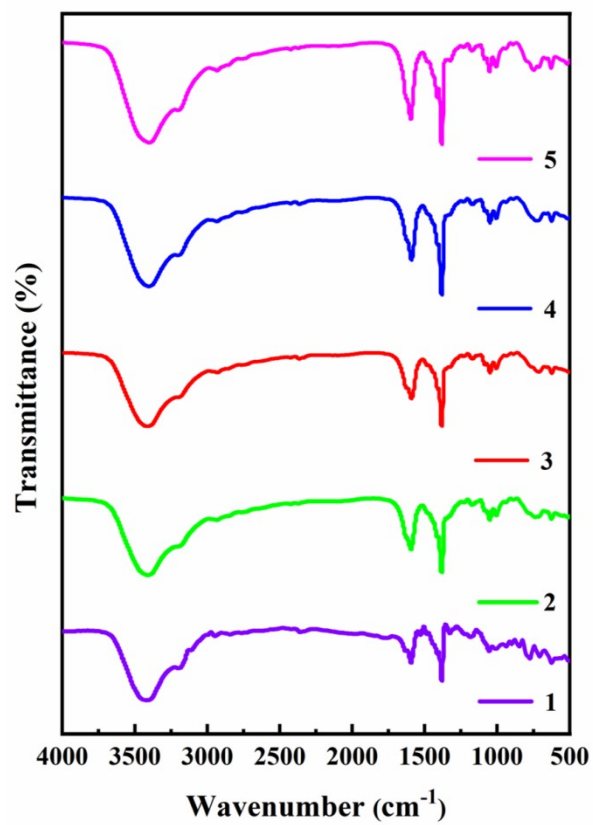

**Fig. S9: The PXRD of 1-5.**

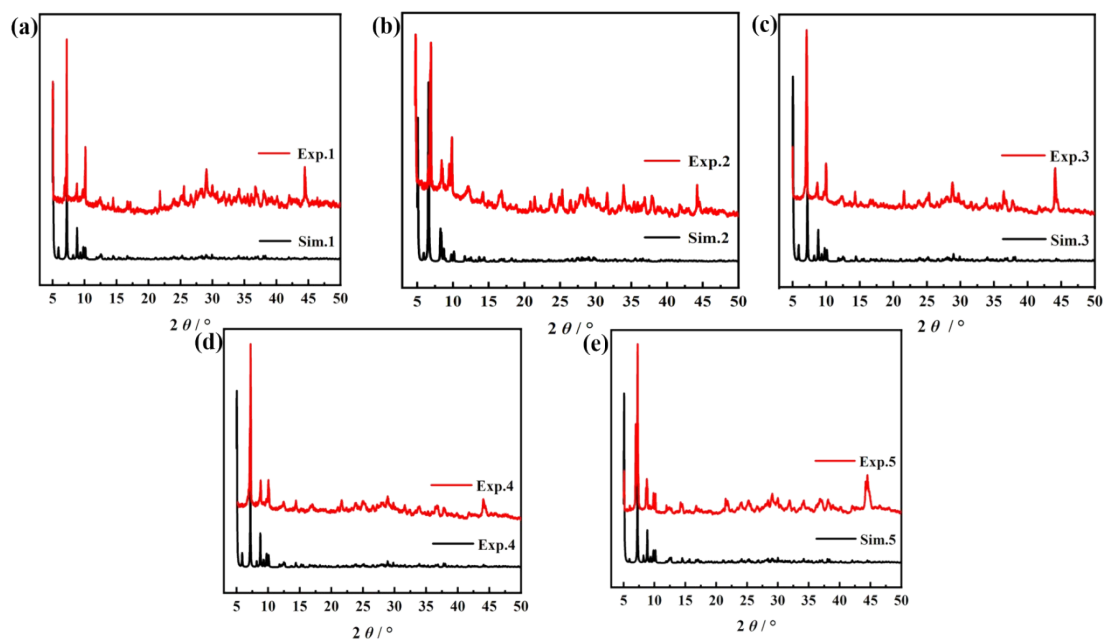

Fig. S10: The TGA of 1-5.

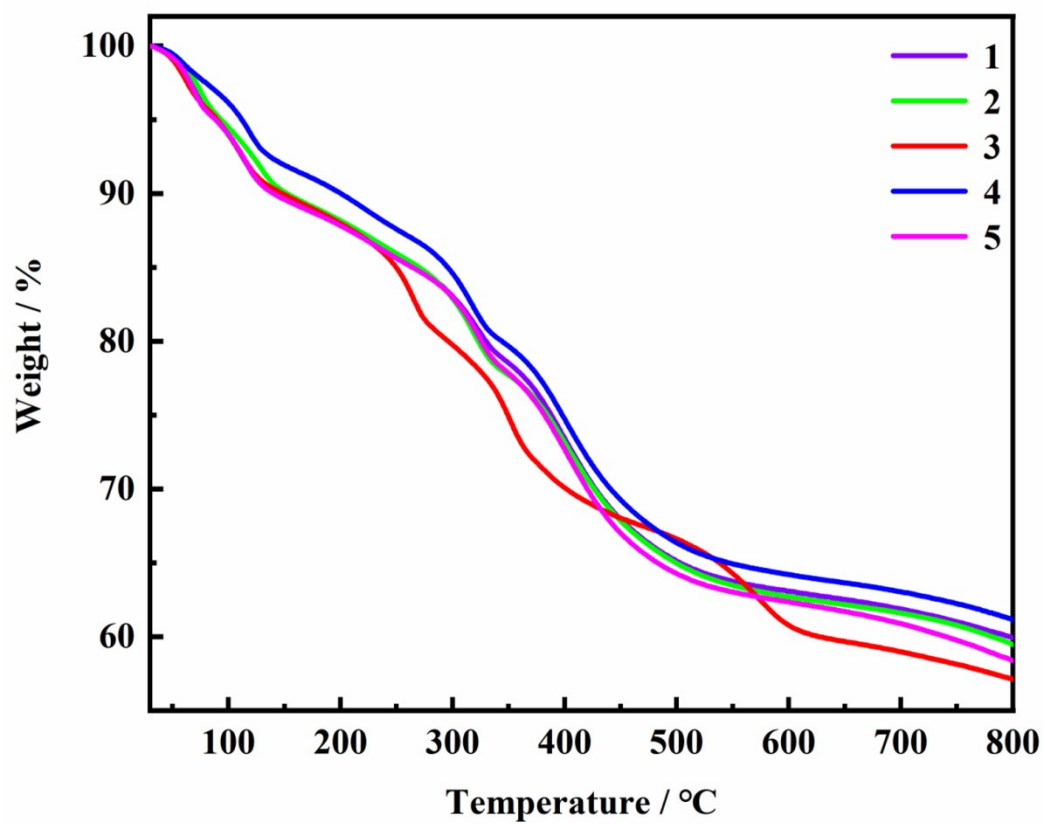

**Fig. S11: Microscope photographs of crystals of 1(a), 2(b), 3(c), 4(d), and 5(e).**

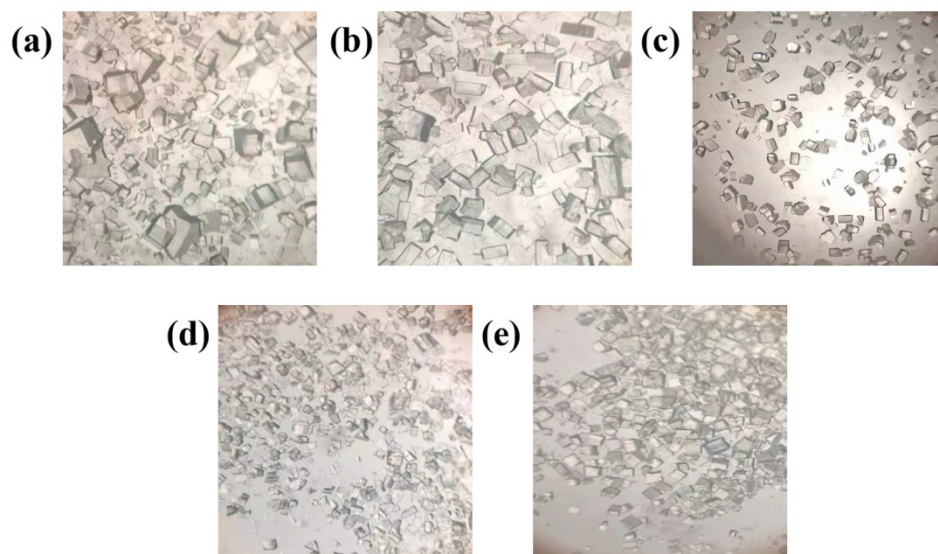

**Table S4:** The hydrogen bond interactions of cluster **1**.

| D-H     | $d(\text{D-H})$ | $d(\text{H}\cdots\text{A})$ | $\angle\text{D-H-A}$ | $d(\text{D}\cdots\text{A})$ | A                        |
|---------|-----------------|-----------------------------|----------------------|-----------------------------|--------------------------|
| O8-H8   | 0.98            | 2.43                        | 157                  | 3.3500                      | C110 [ x, -y+1.5, -z+1 ] |
| O10-H10 | 0.98            | 2.40                        | 157                  | 3.3302                      | C110                     |
| O7-H7   | 0.98            | 2.45                        | 155                  | 3.3673                      | C110                     |
| O8-H8   | 0.98            | 2.42                        | 158                  | 3.3445                      | C110                     |
| O14-H14 | 0.98            | 2.43                        | 157                  | 3.3494                      | C110                     |

**Table S5:** The hydrogen bond interactions of cluster **2**.

| D-H     | $d(\text{D-H})$ | $d(\text{H}\cdots\text{A})$ | $\angle\text{D-H-A}$ | $d(\text{D}\cdots\text{A})$ | A                       |
|---------|-----------------|-----------------------------|----------------------|-----------------------------|-------------------------|
| O10-H10 | 1.00            | 1.86                        | 159                  | 2.8146                      | O39 [ -x+1, y, -z+0.5 ] |
| O7-H7   | 1.00            | 2.04                        | 157                  | 2.9828                      | O39                     |
| O2-H2   | 1.00            | 1.76                        | 173                  | 2.7570                      | O40 [ -x+1, y, -z+0.5 ] |
| O3-H3   | 1.00            | 2.04                        | 155                  | 2.9742                      | O41 [ -x+1, y, -z+0.5 ] |
| O2-H2   | 1.00            | 1.86                        | 162                  | 2.8293                      | O41                     |

**Table S6: Crystal data for 1-5.**

| Identification code | 1                                         | 2                                         | 3                                         | 4                                         | 5                                         |
|---------------------|-------------------------------------------|-------------------------------------------|-------------------------------------------|-------------------------------------------|-------------------------------------------|
| Empirical formula   | $C_{60}H_{152}Cl_{15}Dy_{15}N_{10}O_{80}$ | $C_{60}H_{160}Cl_{11}N_{14}O_{92}Tb_{15}$ | $C_{60}H_{136}Cl_{13}Eu_{15}N_{12}O_{86}$ | $C_{60}H_{144}Cl_{15}N_{10}O_{80}Sm_{15}$ | $C_{60}H_{160}Cl_{15}Ho_{15}N_{10}O_{80}$ |
| Formula weight      | 5227.71                                   | 5323.76                                   | 5071.15                                   | 4966.49                                   | 5307.67                                   |
| Temperature/K       | 293(2)                                    | 100.00(10)                                | 100.01(10)                                | 293(2)                                    | 150.00(10)                                |
| Crystal system      | <i>orthorhombic</i>                       | <i>monoclinic</i>                         | <i>orthorhombic</i>                       | <i>orthorhombic</i>                       | <i>orthorhombic</i>                       |
| Space group         | <i>Pbcm</i>                               | <i>P2/c</i>                               | <i>Pmma</i>                               | <i>Pmma</i>                               | <i>Pbcm</i>                               |
| a/Å                 | 21.5433(3)                                | 13.4425(2)                                | 29.9490(5)                                | 30.0081(9)                                | 21.4098(3)                                |
| b/Å                 | 29.8188(3)                                | 21.4389(4)                                | 12.2649(2)                                | 12.3183(3)                                | 29.7523(4)                                |
| c/Å                 | 24.4709(4)                                | 29.9936(4)                                | 21.5496(4)                                | 21.6051(6)                                | 24.2371(4)                                |
| $\alpha/^\circ$     | 90                                        | 90                                        | 90                                        | 90                                        | 90                                        |
| $\beta/^\circ$      | 90                                        | 91.4480(10)                               | 90                                        | 90                                        | 90                                        |

|                                                |                                                                              |                                                                              |                                                                              |                                                                              |                                                                              |
|------------------------------------------------|------------------------------------------------------------------------------|------------------------------------------------------------------------------|------------------------------------------------------------------------------|------------------------------------------------------------------------------|------------------------------------------------------------------------------|
| $\gamma/^\circ$                                | 90                                                                           | 90                                                                           | 90                                                                           | 90                                                                           | 90                                                                           |
| Volume/ $\text{\AA}^3$                         | 15720.0(4)                                                                   | 8641.2(2)                                                                    | 7915.6(2)                                                                    | 7986.3(4)                                                                    | 15438.8(4)                                                                   |
| Z                                              | 4                                                                            | 2                                                                            | 2                                                                            | 2                                                                            | 4                                                                            |
| $\rho_{\text{calc}}/\text{g}/\text{cm}^3$      | 2.209                                                                        | 2.046                                                                        | 2.128                                                                        | 2.065                                                                        | 2.283                                                                        |
| $\mu/\text{mm}^{-1}$                           | 40.316                                                                       | 6.307                                                                        | 44.276                                                                       | 5.703                                                                        | 16.728                                                                       |
| F(000)                                         | 9800                                                                         | 5032                                                                         | 4800                                                                         | 4696                                                                         | 9960                                                                         |
| Radiation                                      | Cu K $\alpha$<br>( $\lambda = 1.54184$ )                                     | Mo K $\alpha$<br>( $\lambda = 0.71073$ )                                     | Cu K $\alpha$<br>( $\lambda = 1.54184$ )                                     | Mo K $\alpha$<br>( $\lambda = 0.71073$ )                                     | Cu K $\alpha$<br>( $\lambda = 1.54184$ )                                     |
| 2 $\Theta$ range for data collection/ $^\circ$ | 4.102 to 153.372                                                             | 4.018 to 62.066                                                              | 8.206 to 119.976                                                             | 4.008 to 49.998                                                              | 5.086 to 153.502                                                             |
| Index ranges                                   | -27 $\leq$ h $\leq$ 25,<br>-37 $\leq$ k $\leq$ 14,<br>-30 $\leq$ l $\leq$ 30 | -17 $\leq$ h $\leq$ 18,<br>-29 $\leq$ k $\leq$ 25,<br>-42 $\leq$ l $\leq$ 34 | -33 $\leq$ h $\leq$ 19,<br>-13 $\leq$ k $\leq$ 13,<br>-24 $\leq$ l $\leq$ 24 | -35 $\leq$ h $\leq$ 33,<br>-14 $\leq$ k $\leq$ 13,<br>-25 $\leq$ l $\leq$ 20 | -25 $\leq$ h $\leq$ 10,<br>-37 $\leq$ k $\leq$ 37,<br>-30 $\leq$ l $\leq$ 30 |
| Reflections collected                          | 62120                                                                        | 101277                                                                       | 21655                                                                        | 33272                                                                        | 53272                                                                        |



|                                             |                                                                      |                                                                      |                                                                     |                                                                     |                                                                      |
|---------------------------------------------|----------------------------------------------------------------------|----------------------------------------------------------------------|---------------------------------------------------------------------|---------------------------------------------------------------------|----------------------------------------------------------------------|
| Independent reflections                     | 16305<br>[R <sub>int</sub> = 0.0844,<br>R <sub>sigma</sub> = 0.0638] | 22371<br>[R <sub>int</sub> = 0.0477,<br>R <sub>sigma</sub> = 0.0395] | 6296<br>[R <sub>int</sub> = 0.0589,<br>R <sub>sigma</sub> = 0.0428] | 7533<br>[R <sub>int</sub> = 0.0617,<br>R <sub>sigma</sub> = 0.0411] | 15720<br>[R <sub>int</sub> = 0.0906,<br>R <sub>sigma</sub> = 0.0650] |
| Data/restraints/<br>parameters              | 16305/376/846                                                        | 22371/104/910                                                        | 6296/525/650                                                        | 7533/324/654                                                        | 15720/128/860                                                        |
| Goodness-of-fit on F <sup>2</sup>           | 1.291                                                                | 1.023                                                                | 1.04                                                                | 1.134                                                               | 1.016                                                                |
| Final R indexes [I ≥ 2σ (I)]                | R <sub>1</sub> = 0.1042,<br>wR <sub>2</sub> = 0.2998                 | R <sub>1</sub> = 0.0546,<br>wR <sub>2</sub> = 0.1438                 | R <sub>1</sub> = 0.1036,<br>wR <sub>2</sub> = 0.2709                | R <sub>1</sub> = 0.0863,<br>wR <sub>2</sub> = 0.2270                | R <sub>1</sub> = 0.0955,<br>wR <sub>2</sub> = 0.2620                 |
| Final R indexes [all data]                  | R <sub>1</sub> = 0.1218,<br>wR <sub>2</sub> = 0.3187                 | R <sub>1</sub> = 0.0764,<br>wR <sub>2</sub> = 0.1609                 | R <sub>1</sub> = 0.1089,<br>wR <sub>2</sub> = 0.2756                | R <sub>1</sub> = 0.1124,<br>wR <sub>2</sub> = 0.2631                | R <sub>1</sub> = 0.1120,<br>wR <sub>2</sub> = 0.2855                 |
| Largest diff. peak/hole / e Å <sup>-3</sup> | 4.63/-4.40                                                           | 3.04/-2.05                                                           | 3.82/-2.88                                                          | 3.80/-2.54                                                          | 4.80/-3.42                                                           |



**Table S7: Selected bond distances (Å) and angles (°) for 1-5.**

| 1                    |            |                      |             |
|----------------------|------------|----------------------|-------------|
| Dy1—Cl1              | 3.212 (4)  | Dy5—O4               | 2.376 (8)   |
| Dy1—O1               | 2.360 (9)  | Dy5—N4               | 2.556 (10)  |
| Dy1—O2               | 2.516 (9)  | Dy5—O6               | 2.461 (9)   |
| Dy1—O4               | 2.357 (8)  | Dy5—O11              | 2.419 (8)   |
| Dy1—O5               | 2.346 (9)  | Dy5—O15              | 2.385 (8)   |
| Dy1—O6               | 2.517 (9)  | Dy5—O21 <sup>i</sup> | 2.424 (9)   |
| Dy1—O7               | 2.309 (8)  | Dy5—O25              | 2.406 (12)  |
| Dy1—O10              | 2.300 (8)  | Dy5—O27              | 2.449 (14)  |
| Dy1—O11              | 2.380 (9)  | Dy6—O7               | 2.368 (8)   |
| Dy2—O4               | 2.315 (8)  | Dy6—O9               | 2.472 (9)   |
| Dy2—O7               | 2.374 (8)  | Dy6—O11              | 2.393 (9)   |
| Dy2—O9               | 2.526 (10) | Dy6—O15              | 2.414 (9)   |
| Dy2—O15              | 2.366 (9)  | Dy6—O18              | 2.414 (10)  |
| Dy3—O3               | 2.496 (9)  | Dy6—O20              | 2.437 (10)  |
| Dy3—O5               | 2.294 (8)  | Dy6—O30              | 2.436 (13)  |
| Dy3—O8 <sup>i</sup>  | 2.382 (9)  | Dy7—O5               | 2.381 (8)   |
| Dy3—O10              | 2.341 (8)  | Dy7—N5               | 2.576 (13)  |
| Dy3—O12              | 2.341 (8)  | Dy7—O14              | 2.363 (8)   |
| Dy3—O12 <sup>i</sup> | 2.293 (7)  | Dy7—O19              | 2.394 (10)  |
| Dy3—O13              | 2.514 (9)  | Dy7—O22              | 2.411 (10)  |
| Dy3—O14              | 2.390 (9)  | Dy7—O29              | 2.440 (12)  |
| Dy4—N3               | 2.541 (15) | Dy8—Dy3 <sup>i</sup> | 3.7760 (10) |
| Dy4—O10              | 2.372 (8)  | Dy8—O8 <sup>i</sup>  | 2.416 (8)   |
| Dy4—O13              | 2.436 (9)  | Dy8—O8               | 2.355 (9)   |

|            |            |                           |            |
|------------|------------|---------------------------|------------|
| Dy4—O14    | 2.432 (9)  | Dy8—O12                   | 2.374 (9)  |
| Dy4—O17    | 2.405 (10) | Dy8—O16 <sup>i</sup>      | 2.426 (9)  |
| Dy4—O23    | 2.411 (10) | Dy8—O24                   | 2.392 (12) |
| Dy4—O26    | 2.434 (12) | Dy8—O28                   | 2.430 (17) |
| O1—Dy1—Cl1 | 129.0 (3)  | O6—Dy5—O2W                | 71.1 (4)   |
| O1—Dy1—O2  | 67.9 (3)   | O6—Dy5—N4                 | 63.9 (3)   |
| O1—Dy1—O6  | 76.7 (3)   | O11—Dy5—O2W               | 134.9 (4)  |
| O1—Dy1—O11 | 100.4 (3)  | O11—Dy5—N4                | 77.9 (4)   |
| O2—Dy1—Cl1 | 118.9 (2)  | O11—Dy5—O6                | 68.6 (3)   |
| O2—Dy1—O6  | 123.1 (3)  | O11—Dy5—O21 <sup>i</sup>  | 140.1 (3)  |
| O4—Dy1—Cl1 | 65.7 (3)   | O11—Dy5—O27               | 138.6 (4)  |
| O4—Dy1—O1  | 141.0 (3)  | O15—Dy5—O2W               | 125.7 (4)  |
| O4—Dy1—O2  | 143.3 (3)  | O15—Dy5—N4                | 132.3 (4)  |
| O4—Dy1—O6  | 65.9 (3)   | O15—Dy5—O6                | 123.9 (3)  |
| O4—Dy1—O11 | 76.3 (3)   | O15—Dy5—O11               | 66.2 (3)   |
| O5—Dy1—Cl1 | 64.8 (3)   | O15—Dy5—O21 <sup>i</sup>  | 74.1 (3)   |
| O5—Dy1—O1  | 75.7 (3)   | O15—Dy5—O25               | 78.2 (4)   |
| O5—Dy1—O2  | 66.9 (3)   | O15—Dy5—O27               | 132.0 (4)  |
| O5—Dy1—O4  | 130.4 (3)  | O21 <sup>i</sup> —Dy5—O2W | 73.5 (4)   |
| O5—Dy1—O6  | 142.9 (3)  | O21 <sup>i</sup> —Dy5—N4  | 130.3 (3)  |
| O5—Dy1—O11 | 141.3 (3)  | O21 <sup>i</sup> —Dy5—O6  | 144.2 (3)  |
| O6—Dy1—Cl1 | 118.1 (2)  | O21 <sup>i</sup> —Dy5—O27 | 68.8 (4)   |
| O7—Dy1—Cl1 | 66.8 (3)   | O25—Dy5—O2W               | 140.4 (5)  |
| O7—Dy1—O1  | 145.4 (3)  | O25—Dy5—N4                | 65.8 (4)   |
| O7—Dy1—O2  | 77.6 (3)   | O25—Dy5—O6                | 125.3 (4)  |
| O7—Dy1—O4  | 71.5 (3)   | O25—Dy5—O11               | 81.4 (4)   |
| O7—Dy1—O5  | 89.3 (3)   | O25—Dy5—O21 <sup>i</sup>  | 86.5 (4)   |

|                                      |           |             |           |
|--------------------------------------|-----------|-------------|-----------|
| O7—Dy1—O6                            | 126.9 (3) | O25—Dy5—O27 | 70.2 (5)  |
| O7—Dy1—O11                           | 72.1 (3)  | O27—Dy5—O2W | 70.8 (5)  |
| O10—Dy1—Cl1                          | 64.9 (3)  | O27—Dy5—N4  | 63.3 (4)  |
| O10—Dy1—O1                           | 72.2 (3)  | O27—Dy5—O6  | 103.9 (4) |
| O10—Dy1—O2                           | 126.6 (3) | O1W—Dy6—N1  | 99.7 (4)  |
| O10—Dy1—O4                           | 89.3 (3)  | O7—Dy6—O1W  | 72.5 (4)  |
| O10—Dy1—O5                           | 69.9 (3)  | O7—Dy6—N1   | 128.8 (3) |
| O10—Dy1—O6                           | 78.3 (3)  | O7—Dy6—O9   | 67.3 (3)  |
| O10—Dy1—O7                           | 131.7 (3) | O7—Dy6—O11  | 70.9 (3)  |
| O10—Dy1—O11                          | 146.6 (3) | O7—Dy6—O15  | 75.3 (3)  |
| O11—Dy1—Cl1                          | 130.6 (3) | O7—Dy6—O18  | 146.6 (4) |
| O11—Dy1—O2                           | 75.9 (3)  | O7—Dy6—O20  | 95.8 (3)  |
| O11—Dy1—O6                           | 68.3 (3)  | O7—Dy6—O30  | 142.2 (4) |
| O4 <sup>i</sup> —Dy2—O4              | 129.6 (4) | O9—Dy6—O1W  | 71.7 (4)  |
| O4—Dy2—O7 <sup>i</sup>               | 88.0 (3)  | O9—Dy6—N1   | 62.5 (3)  |
| O4—Dy2—O7                            | 71.0 (3)  | O11—Dy6—O1W | 126.7 (4) |
| O4—Dy2—O9                            | 127.5 (3) | O11—Dy6—N1  | 133.5 (4) |
| O4 <sup>i</sup> —Dy2—O9              | 78.4 (3)  | O11—Dy6—O9  | 124.3 (3) |
| O4 <sup>i</sup> —Dy2—O9 <sup>i</sup> | 127.5 (3) | O11—Dy6—O15 | 66.2 (3)  |
| O4—Dy2—O15 <sup>i</sup>              | 146.9 (3) | O11—Dy6—O18 | 78.8 (3)  |
| O4 <sup>i</sup> —Dy2—O15             | 146.9 (3) | O11—Dy6—O20 | 73.5 (3)  |
| O4—Dy2—O15                           | 72.5 (3)  | O11—Dy6—O30 | 130.8 (4) |
| O7 <sup>i</sup> —Dy2—O7              | 130.1 (4) | O15—Dy6—O1W | 136.2 (4) |
| O7—Dy2—O9 <sup>i</sup>               | 143.6 (3) | O15—Dy6—N1  | 78.5 (4)  |
| O7—Dy2—O9                            | 66.3 (3)  | O15—Dy6—O9  | 68.9 (3)  |
| O9 <sup>i</sup> —Dy2—O9              | 123.0 (5) | O15—Dy6—O18 | 79.9 (4)  |
| O15 <sup>i</sup> —Dy2—O7             | 140.6 (3) | O15—Dy6—O20 | 139.4 (3) |

|                                       |           |             |           |
|---------------------------------------|-----------|-------------|-----------|
| O15 <sup>i</sup> —Dy2—O7 <sup>i</sup> | 76.1 (3)  | O15—Dy6—O30 | 138.5 (4) |
| O15—Dy2—O9 <sup>i</sup>               | 76.2 (3)  | O18—Dy6—O1W | 139.6 (4) |
| O15—Dy2—O9                            | 68.7 (3)  | O18—Dy6—N1  | 65.6 (3)  |
| O15 <sup>i</sup> —Dy2—O15             | 101.8 (4) | O18—Dy6—O9  | 123.3 (3) |
| O3—Dy3—Cl1                            | 119.0 (2) | O18—Dy6—O20 | 88.5 (3)  |
| O3—Dy3—O13                            | 122.4 (3) | O18—Dy6—O30 | 69.8 (4)  |
| O5—Dy3—Cl1                            | 65.5 (2)  | O20—Dy6—O1W | 73.2 (4)  |
| O5—Dy3—O3                             | 79.3 (3)  | O20—Dy6—N1  | 131.2 (4) |
| O5—Dy3—O8 <sup>i</sup>                | 147.5 (3) | O20—Dy6—O9  | 144.3 (3) |
| O5—Dy3—O10                            | 70.1 (3)  | O30—Dy6—O1W | 70.0 (5)  |
| O5—Dy3—O12                            | 90.2 (3)  | O30—Dy6—N1  | 63.6 (4)  |
| O5—Dy3—O13                            | 126.0 (3) | O30—Dy6—O9  | 104.6 (4) |
| O5—Dy3—O14                            | 71.9 (3)  | O30—Dy6—O20 | 68.9 (4)  |
| O8 <sup>i</sup> —Dy3—Cl1              | 129.0 (3) | O1—Dy7—O2   | 67.7 (3)  |
| O8 <sup>i</sup> —Dy3—O3               | 68.3 (3)  | O1—Dy7—O5W  | 135.4 (4) |
| O8 <sup>i</sup> —Dy3—O13              | 76.3 (3)  | O1—Dy7—N5   | 78.7 (3)  |
| O8 <sup>i</sup> —Dy3—O14              | 101.6 (3) | O1—Dy7—O22  | 140.5 (3) |
| O10—Dy3—Cl1                           | 64.9 (2)  | O1—Dy7—O29  | 139.2 (3) |
| O10—Dy3—O3                            | 143.8 (3) | O2—Dy7—N5   | 63.4 (3)  |
| O10—Dy3—O8 <sup>i</sup>               | 140.7 (3) | O5W—Dy7—O2  | 71.9 (4)  |
| O10—Dy3—O12                           | 130.3 (3) | O5W—Dy7—N5  | 99.5 (4)  |
| O10—Dy3—O13                           | 66.4 (3)  | O5—Dy7—O1   | 74.1 (3)  |
| O10—Dy3—O14                           | 76.1 (3)  | O5—Dy7—O2   | 67.0 (3)  |
| O12 <sup>i</sup> —Dy3—Cl1             | 65.8 (3)  | O5—Dy7—O5W  | 73.5 (4)  |
| O12—Dy3—Cl1                           | 65.4 (2)  | O5—Dy7—N5   | 129.3 (3) |
| O12 <sup>i</sup> —Dy3—O3              | 126.5 (3) | O5—Dy7—O19  | 147.1 (4) |
| O12—Dy3—O3                            | 66.7 (3)  | O5—Dy7—O22  | 96.1 (3)  |

|                                       |           |                          |           |
|---------------------------------------|-----------|--------------------------|-----------|
| O12 <sup>i</sup> —Dy3—O5              | 131.3 (3) | O5—Dy7—O29               | 144.0 (4) |
| O12 <sup>i</sup> —Dy3—O8 <sup>i</sup> | 71.2 (3)  | O14—Dy7—O1               | 66.3 (3)  |
| O12—Dy3—O8 <sup>i</sup>               | 75.3 (3)  | O14—Dy7—O2               | 123.9 (3) |
| O12 <sup>i</sup> —Dy3—O10             | 88.9 (3)  | O14—Dy7—O5W              | 127.7 (4) |
| O12 <sup>i</sup> —Dy3—O12             | 70.4 (4)  | O14—Dy7—O5               | 70.9 (3)  |
| O12 <sup>i</sup> —Dy3—O13             | 78.2 (3)  | O14—Dy7—N5               | 132.7 (4) |
| O12—Dy3—O13                           | 142.9 (3) | O14—Dy7—O19              | 78.9 (3)  |
| O12 <sup>i</sup> —Dy3—O14             | 146.1 (3) | O14—Dy7—O22              | 74.3 (3)  |
| O12—Dy3—O14                           | 141.5 (3) | O14—Dy7—O29              | 127.8 (4) |
| O13—Dy3—Cl1                           | 118.6 (2) | O19—Dy7—O1               | 82.2 (4)  |
| O14—Dy3—Cl1                           | 129.5 (3) | O19—Dy7—O2               | 124.0 (3) |
| O14—Dy3—O3                            | 76.4 (3)  | O19—Dy7—O5W              | 138.0 (4) |
| O14—Dy3—O13                           | 67.9 (3)  | O19—Dy7—N5               | 65.2 (4)  |
| O1—Dy4—O3W                            | 125.6 (4) | O19—Dy7—O22              | 87.9 (4)  |
| O1—Dy4—N3                             | 131.6 (4) | O19—Dy7—O29              | 66.8 (4)  |
| O1—Dy4—O13                            | 123.3 (3) | O22—Dy7—O2               | 144.0 (3) |
| O1—Dy4—O14                            | 65.4 (3)  | O22—Dy7—O5W              | 72.8 (4)  |
| O1—Dy4—O17                            | 74.2 (3)  | O22—Dy7—N5               | 130.5 (3) |
| O1—Dy4—O23                            | 79.4 (4)  | O22—Dy7—O29              | 66.6 (4)  |
| O1—Dy4—O26                            | 133.7 (4) | O29—Dy7—O2               | 108.0 (4) |
| O3W—Dy4—N3                            | 102.7 (5) | O29—Dy7—O5W              | 71.3 (5)  |
| O10—Dy4—O1                            | 70.2 (3)  | O29—Dy7—N5               | 64.8 (4)  |
| O10—Dy4—O3W                           | 72.0 (4)  | O4W—Dy8—N2               | 99.5 (4)  |
| O10—Dy4—N3                            | 130.0 (4) | O4W—Dy8—O3               | 72.7 (3)  |
| O10—Dy4—O13                           | 67.2 (3)  | O3—Dy8—N2                | 63.4 (3)  |
| O10—Dy4—O14                           | 74.7 (3)  | O8—Dy8—O4W               | 126.8 (4) |
| O10—Dy4—O17                           | 97.0 (3)  | O8 <sup>i</sup> —Dy8—O4W | 136.2 (4) |

|             |           |                                       |           |
|-------------|-----------|---------------------------------------|-----------|
| O10—Dy4—O23 | 148.0 (4) | O8 <sup>i</sup> —Dy8—N2               | 79.8 (4)  |
| O10—Dy4—O26 | 140.9 (4) | O8—Dy8—N2                             | 133.6 (4) |
| O13—Dy4—O3W | 72.7 (4)  | O8 <sup>i</sup> —Dy8—O3               | 68.0 (3)  |
| O13—Dy4—N3  | 64.0 (4)  | O8—Dy8—O3                             | 122.6 (3) |
| O14—Dy4—O3W | 136.1 (4) | O8—Dy8—O8 <sup>i</sup>                | 65.2 (4)  |
| O14—Dy4—N3  | 78.0 (4)  | O8—Dy8—O12                            | 70.3 (3)  |
| O14—Dy4—O13 | 68.5 (3)  | O8 <sup>i</sup> —Dy8—O16 <sup>i</sup> | 138.3 (3) |
| O14—Dy4—O26 | 139.1 (3) | O8—Dy8—O16 <sup>i</sup>               | 73.5 (3)  |
| O17—Dy4—O3W | 73.2 (4)  | O8—Dy8—O24                            | 79.5 (4)  |
| O17—Dy4—N3  | 130.0 (4) | O8 <sup>i</sup> —Dy8—O28              | 139.7 (4) |
| O17—Dy4—O13 | 145.5 (3) | O8—Dy8—O28                            | 131.7 (4) |
| O17—Dy4—O14 | 139.2 (3) | O12—Dy8—O4W                           | 73.1 (4)  |
| O17—Dy4—O23 | 83.9 (4)  | O12—Dy8—N2                            | 129.1 (3) |
| O17—Dy4—O26 | 69.4 (4)  | O12—Dy8—O3                            | 66.5 (3)  |
| O23—Dy4—O3W | 137.3 (5) | O12—Dy8—O8 <sup>i</sup>               | 74.1 (3)  |
| O23—Dy4—N3  | 65.6 (5)  | O12—Dy8—O16 <sup>i</sup>              | 97.0 (3)  |
| O23—Dy4—O13 | 126.1 (4) | O12—Dy8—O24                           | 147.0 (4) |
| O23—Dy4—O14 | 83.8 (4)  | O12—Dy8—O28                           | 142.1 (5) |
| O23—Dy4—O26 | 69.3 (4)  | O16 <sup>i</sup> —Dy8—O4W             | 74.2 (3)  |
| O26—Dy4—O3W | 69.0 (4)  | O16 <sup>i</sup> —Dy8—N2              | 130.2 (4) |
| O26—Dy4—N3  | 63.1 (5)  | O16 <sup>i</sup> —Dy8—O3              | 146.1 (3) |
| O26—Dy4—O13 | 102.8 (4) | O16 <sup>i</sup> —Dy8—O28             | 68.7 (4)  |
| O2W—Dy5—N4  | 101.8 (4) | O24—Dy8—O4W                           | 138.5 (5) |
| O4—Dy5—O2W  | 70.8 (4)  | O24—Dy8—N2                            | 65.5 (4)  |
| O4—Dy5—N4   | 129.3 (3) | O24—Dy8—O3                            | 123.7 (3) |
| O4—Dy5—O6   | 66.5 (3)  | O24—Dy8—O8 <sup>i</sup>               | 81.4 (4)  |
| O4—Dy5—O11  | 75.2 (3)  | O24—Dy8—O16 <sup>i</sup>              | 86.7 (3)  |



|                                        |             |                      |           |
|----------------------------------------|-------------|----------------------|-----------|
| O4—Dy5—O15                             | 71.1 (3)    | O24—Dy8—O28          | 69.5 (6)  |
| O4—Dy5—O21 <sup>i</sup>                | 96.7 (3)    | O28—Dy8—O4W          | 69.3 (6)  |
| O4—Dy5—O25                             | 146.9 (4)   | O28—Dy8—N2           | 63.2 (4)  |
| O4—Dy5—O27                             | 141.4 (4)   | O28—Dy8—O3           | 105.5 (4) |
| Symmetry code: (i) $x, -y+3/2, -z+1$ . |             |                      |           |
| <b>2</b>                               |             |                      |           |
| Tb1—O1                                 | 2.377 (5)   | Tb4—O31              | 2.445 (7) |
| Tb1—O2                                 | 2.372 (6)   | Tb5—O5               | 2.380 (6) |
| Tb1—O3                                 | 2.323 (5)   | Tb5—O6               | 2.412 (5) |
| Tb1—O27                                | 2.515 (6)   | Tb5—O7               | 2.321 (6) |
| Cl1—Tb3                                | 3.1972 (11) | Tb5—O9               | 2.391 (6) |
| Cl1—Tb5                                | 3.216 (3)   | Tb5—O10 <sup>i</sup> | 2.325 (5) |
| O1—Tb2                                 | 2.406 (6)   | Tb5—O10              | 2.379 (5) |
| O1—Tb4                                 | 2.400 (6)   | Tb5—O11              | 2.477 (6) |
| Tb2—O3                                 | 2.342 (5)   | Tb5—O17              | 2.505 (6) |
| Tb2—O4                                 | 2.441 (7)   | Tb6—O6               | 2.434 (7) |
| Tb2—O4W                                | 2.476 (8)   | Tb6—O8               | 2.400 (6) |
| Tb2—O22                                | 2.481 (6)   | Tb6—O17              | 2.473 (6) |
| Tb2—O23                                | 2.395 (7)   | Tb6—O18              | 2.443 (8) |
| Tb2—O24                                | 2.445 (8)   | Tb6—O19              | 2.444 (7) |
| Tb2—O26                                | 2.437 (7)   | Tb6—O21              | 2.416 (7) |
| Tb3—O3                                 | 2.374 (6)   | Tb7—O9 <sup>i</sup>  | 2.395 (6) |
| Tb3—O4                                 | 2.400 (6)   | Tb7—O9               | 2.410 (6) |
| Tb3—O5                                 | 2.323 (5)   | Tb7—O10              | 2.351 (6) |
| Tb3—O7                                 | 2.387 (6)   | Tb7—O11              | 2.502 (6) |
| Tb3—O8                                 | 2.388 (6)   | Tb7—O13              | 2.475 (9) |
| Tb3—O22                                | 2.533 (6)   | Tb7—O14              | 2.466 (9) |

|                                       |             |                           |             |
|---------------------------------------|-------------|---------------------------|-------------|
| Tb3—O32                               | 2.489 (6)   | Tb7—O16 <sup>i</sup>      | 2.450 (7)   |
| Tb4—O4                                | 2.366 (6)   | Tb8—O8                    | 2.407 (6)   |
| Tb4—N5 <sup>i</sup>                   | 2.562 (8)   | Tb8—O12                   | 2.448 (7)   |
| Tb4—O27 <sup>i</sup>                  | 2.501 (6)   | Tb8—O32                   | 2.488 (6)   |
| Tb4—O28 <sup>i</sup>                  | 2.470 (11)  | Tb8—O33                   | 2.445 (8)   |
| Tb4—O29 <sup>i</sup>                  | 2.466 (9)   | Tb8—O34                   | 2.472 (8)   |
| O1—Tb1—O1 <sup>i</sup>                | 100.8 (3)   | O7—Tb5—O10                | 90.6 (2)    |
| O1 <sup>i</sup> —Tb1—O27              | 68.1 (2)    | O7—Tb5—O10 <sup>i</sup>   | 134.6 (2)   |
| O1 <sup>i</sup> —Tb1—O27 <sup>i</sup> | 74.5 (2)    | O7—Tb5—O11                | 77.6 (2)    |
| O1—Tb1—O27                            | 74.5 (2)    | O7—Tb5—O17                | 126.0 (2)   |
| O1—Tb1—O27 <sup>i</sup>               | 68.1 (2)    | O9—Tb5—C11                | 129.33 (14) |
| O2 <sup>i</sup> —Tb1—O1               | 138.9 (2)   | O9—Tb5—O6                 | 101.4 (2)   |
| O2—Tb1—O1                             | 75.0 (2)    | O9—Tb5—O11                | 67.6 (2)    |
| O2 <sup>i</sup> —Tb1—O1 <sup>i</sup>  | 75.0 (2)    | O9—Tb5—O17                | 76.2 (2)    |
| O2—Tb1—O1 <sup>i</sup>                | 138.9 (2)   | O10 <sup>i</sup> —Tb5—C11 | 67.03 (14)  |
| O2 <sup>i</sup> —Tb1—O2               | 134.4 (3)   | O10—Tb5—C11               | 66.54 (14)  |
| O2 <sup>i</sup> —Tb1—O27              | 65.88 (19)  | O10—Tb5—O5                | 132.35 (19) |
| O2 <sup>i</sup> —Tb1—O27 <sup>i</sup> | 142.9 (2)   | O10 <sup>i</sup> —Tb5—O5  | 89.69 (19)  |
| O3 <sup>i</sup> —Tb1—O1               | 146.8 (2)   | O10—Tb5—O6                | 140.9 (2)   |
| O3—Tb1—O1                             | 71.48 (19)  | O10 <sup>i</sup> —Tb5—O6  | 144.9 (2)   |
| O3—Tb1—O2                             | 71.9 (2)    | O10 <sup>i</sup> —Tb5—O9  | 70.9 (2)    |
| O3—Tb1—O2 <sup>i</sup>                | 89.76 (19)  | O10—Tb5—O9                | 74.5 (2)    |
| O3 <sup>i</sup> —Tb1—O2 <sup>i</sup>  | 71.9 (2)    | O10 <sup>i</sup> —Tb5—O10 | 71.8 (2)    |
| O3 <sup>i</sup> —Tb1—O2               | 89.76 (19)  | O10—Tb5—O11               | 66.3 (2)    |
| O3 <sup>i</sup> —Tb1—O3               | 132.0 (3)   | O10 <sup>i</sup> —Tb5—O11 | 126.8 (2)   |
| O3—Tb1—O27 <sup>i</sup>               | 127.14 (19) | O10—Tb5—O17               | 143.1 (2)   |
| O3 <sup>i</sup> —Tb1—O27 <sup>i</sup> | 78.7 (2)    | O10 <sup>i</sup> —Tb5—O17 | 77.7 (2)    |

|                           |            |             |             |
|---------------------------|------------|-------------|-------------|
| O27 <sup>i</sup> —Tb1—O27 | 119.8 (3)  | O11—Tb5—C11 | 119.67 (15) |
| O1—Tb2—O4                 | 65.0 (2)   | O11—Tb5—O17 | 121.0 (2)   |
| O1—Tb2—O4W                | 127.8 (2)  | O17—Tb5—C11 | 119.31 (15) |
| O1—Tb2—O22                | 122.7 (2)  | O3W—Tb6—N2  | 99.7 (3)    |
| O1—Tb2—O24                | 134.2 (3)  | O3W—Tb6—O17 | 72.8 (2)    |
| O1—Tb2—O26                | 73.6 (2)   | O5—Tb6—N2   | 129.8 (2)   |
| O3—Tb2—O1                 | 70.66 (19) | O5—Tb6—O3W  | 73.8 (2)    |
| O3—Tb2—O4                 | 74.4 (2)   | O5—Tb6—O6   | 75.1 (2)    |
| O3—Tb2—N4                 | 129.3 (2)  | O5—Tb6—O8   | 70.09 (19)  |
| O3—Tb2—O22                | 67.11 (18) | O5—Tb6—O17  | 67.37 (19)  |
| O3—Tb2—O23                | 147.0 (2)  | O5—Tb6—O18  | 139.8 (3)   |
| O3—Tb2—O24                | 140.5 (3)  | O5—Tb6—O19  | 148.7 (2)   |
| O3—Tb2—O26                | 97.6 (2)   | O5—Tb6—O21  | 97.7 (2)    |
| O4—Tb2—O4W                | 136.2 (2)  | O6—Tb6—N2   | 78.0 (3)    |
| O4—Tb2—O22                | 67.6 (2)   | O6—Tb6—O3W  | 136.4 (2)   |
| O4—Tb2—O24                | 139.4 (2)  | O6—Tb6—O17  | 67.4 (2)    |
| O4W—Tb2—O22               | 73.0 (3)   | O6—Tb6—O18  | 139.5 (3)   |
| O22—Tb2—N4                | 63.4 (2)   | O6—Tb6—O19  | 84.2 (3)    |
| O23—Tb2—O1                | 77.7 (2)   | O8—Tb6—N2   | 132.0 (3)   |
| O23—Tb2—O4                | 84.2 (3)   | O8—Tb6—O3W  | 128.1 (3)   |
| O23—Tb2—O4W               | 136.6 (3)  | O8—Tb6—O6   | 65.4 (2)    |
| O23—Tb2—N4                | 67.2 (2)   | O8—Tb6—O17  | 122.3 (2)   |
| O23—Tb2—O22               | 126.9 (2)  | O8—Tb6—O18  | 134.4 (3)   |
| O23—Tb2—O24               | 70.4 (3)   | O8—Tb6—O19  | 80.1 (2)    |
| O23—Tb2—O26               | 81.8 (3)   | O8—Tb6—O21  | 73.2 (2)    |
| O24—Tb2—O4W               | 67.3 (3)   | O17—Tb6—N2  | 63.3 (2)    |
| O24—Tb2—N4                | 63.8 (3)   | O18—Tb6—N2  | 63.5 (3)    |

|             |             |                          |           |
|-------------|-------------|--------------------------|-----------|
| O24—Tb2—O22 | 102.8 (3)   | O18—Tb6—O3W              | 66.3 (3)  |
| O26—Tb2—O4  | 138.2 (2)   | O18—Tb6—O17              | 103.1 (3) |
| O26—Tb2—O4W | 75.1 (3)    | O18—Tb6—O19              | 69.6 (3)  |
| O26—Tb2—N4  | 130.7 (2)   | O19—Tb6—N2               | 65.9 (2)  |
| O26—Tb2—O22 | 147.5 (2)   | O19—Tb6—O3W              | 135.2 (3) |
| O26—Tb2—O24 | 70.1 (2)    | O19—Tb6—O17              | 125.4 (2) |
| O2—Tb3—O3   | 71.9 (2)    | O21—Tb6—N2               | 129.8 (2) |
| O2—Tb3—O4   | 70.2 (2)    | O21—Tb6—O3W              | 76.3 (3)  |
| O2—Tb3—O5   | 135.39 (19) | O21—Tb6—O6               | 138.0 (2) |
| O2—Tb3—O7   | 92.5 (2)    | O21—Tb6—O17              | 148.4 (2) |
| O2—Tb3—O8   | 145.9 (2)   | O21—Tb6—O18              | 69.7 (3)  |
| O2—Tb3—O22  | 126.0 (2)   | O21—Tb6—O19              | 82.2 (3)  |
| O2—Tb3—O32  | 78.4 (2)    | O1W—Tb7—N1               | 96.9 (3)  |
| O3—Tb3—C11  | 66.56 (13)  | O1W—Tb7—O11              | 71.7 (3)  |
| O3—Tb3—O4   | 74.6 (2)    | O1W—Tb7—O13              | 136.0 (4) |
| O3—Tb3—O7   | 133.89 (18) | O1W—Tb7—O14              | 69.1 (4)  |
| O3—Tb3—O8   | 139.1 (2)   | O1W—Tb7—O16 <sup>i</sup> | 75.2 (3)  |
| O3—Tb3—O22  | 65.80 (19)  | O9—Tb7—O1W               | 135.5 (3) |
| O3—Tb3—O32  | 143.89 (19) | O9 <sup>i</sup> —Tb7—O1W | 129.9 (3) |
| O4—Tb3—O22  | 67.4 (2)    | O9 <sup>i</sup> —Tb7—N1  | 133.0 (3) |
| O4—Tb3—O32  | 76.4 (2)    | O9—Tb7—N1                | 78.7 (3)  |
| O5—Tb3—C11  | 66.66 (14)  | O9 <sup>i</sup> —Tb7—O9  | 65.3 (2)  |
| O5—Tb3—O3   | 89.5 (2)    | O9 <sup>i</sup> —Tb7—O11 | 121.7 (2) |
| O5—Tb3—O4   | 144.2 (2)   | O9—Tb7—O11               | 66.9 (2)  |
| O5—Tb3—O7   | 71.4 (2)    | O9 <sup>i</sup> —Tb7—O13 | 80.8 (3)  |
| O5—Tb3—O8   | 70.65 (19)  | O9—Tb7—O13               | 82.3 (3)  |
| O5—Tb3—O22  | 76.86 (19)  | O9—Tb7—O14               | 140.1 (3) |

|                          |             |                                       |            |
|--------------------------|-------------|---------------------------------------|------------|
| O5—Tb3—O32               | 126.4 (2)   | O9 <sup>i</sup> —Tb7—O14              | 129.2 (4)  |
| O7—Tb3—C11               | 67.34 (14)  | O9—Tb7—O16 <sup>i</sup>               | 139.0 (2)  |
| O7—Tb3—O4                | 141.4 (2)   | O9 <sup>i</sup> —Tb7—O16 <sup>i</sup> | 73.8 (2)   |
| O7—Tb3—O8                | 74.2 (2)    | O10—Tb7—O1W                           | 74.4 (3)   |
| O7—Tb3—O22               | 141.30 (19) | O10—Tb7—N1                            | 128.7 (2)  |
| O7—Tb3—O32               | 66.3 (2)    | O10—Tb7—O9 <sup>i</sup>               | 70.4 (2)   |
| O8—Tb3—O4                | 100.63 (19) | O10—Tb7—O9                            | 74.7 (2)   |
| O8—Tb3—O22               | 74.8 (2)    | O10—Tb7—O11                           | 66.29 (19) |
| O8—Tb3—O32               | 67.4 (2)    | O10—Tb7—O13                           | 148.6 (3)  |
| O32—Tb3—O22              | 120.5 (2)   | O10—Tb7—O14                           | 142.4 (4)  |
| O32—Tb3—C11              | 120.65 (16) | O10—Tb7—O16 <sup>i</sup>              | 95.4 (2)   |
| O1—Tb4—O2W               | 137.3 (3)   | O11—Tb7—N1                            | 63.1 (2)   |
| O1—Tb4—N5 <sup>i</sup>   | 79.3 (3)    | O13—Tb7—N1                            | 64.8 (3)   |
| O1—Tb4—O27 <sup>i</sup>  | 68.0 (2)    | O13—Tb7—O11                           | 123.2 (3)  |
| O1—Tb4—O28 <sup>i</sup>  | 77.4 (3)    | O14—Tb7—N1                            | 65.8 (3)   |
| O1—Tb4—O29 <sup>i</sup>  | 136.8 (3)   | O14—Tb7—O11                           | 108.9 (4)  |
| O1—Tb4—O31               | 139.7 (2)   | O14—Tb7—O13                           | 67.0 (4)   |
| O2—Tb4—O1                | 74.7 (2)    | O16 <sup>i</sup> —Tb7—N1              | 131.9 (3)  |
| O2—Tb4—O2W               | 77.7 (3)    | O16 <sup>i</sup> —Tb7—O11             | 145.4 (2)  |
| O2—Tb4—O4                | 70.1 (2)    | O16 <sup>i</sup> —Tb7—O13             | 88.1 (3)   |
| O2—Tb4—N5 <sup>i</sup>   | 128.1 (2)   | O16 <sup>i</sup> —Tb7—O14             | 67.1 (3)   |
| O2—Tb4—O27 <sup>i</sup>  | 66.27 (19)  | O5W—Tb8—N3                            | 95.4 (3)   |
| O2—Tb4—O28 <sup>i</sup>  | 145.4 (3)   | O5W—Tb8—O12                           | 74.8 (3)   |
| O2—Tb4—O29 <sup>i</sup>  | 147.6 (4)   | O5W—Tb8—O32                           | 71.6 (3)   |
| O2—Tb4—O31               | 93.5 (2)    | O5W—Tb8—O33                           | 70.7 (4)   |
| O2W—Tb4—N5 <sup>i</sup>  | 93.1 (3)    | O5W—Tb8—O34                           | 137.4 (3)  |
| O2W—Tb4—O27 <sup>i</sup> | 71.3 (3)    | O6—Tb8—N3                             | 134.2 (3)  |

|                                        |            |             |            |
|----------------------------------------|------------|-------------|------------|
| O2W—Tb4—O28 <sup>i</sup>               | 136.7 (4)  | O6—Tb8—O5W  | 130.3 (3)  |
| O2W—Tb4—O29 <sup>i</sup>               | 72.1 (4)   | O6—Tb8—O8   | 66.0 (2)   |
| O2W—Tb4—O31                            | 73.4 (3)   | O6—Tb8—O12  | 72.8 (2)   |
| O4—Tb4—O1                              | 66.2 (2)   | O6—Tb8—O32  | 122.8 (2)  |
| O4—Tb4—O2W                             | 131.5 (3)  | O6—Tb8—O33  | 125.2 (3)  |
| O4—Tb4—N5 <sup>i</sup>                 | 135.3 (3)  | O6—Tb8—O34  | 80.2 (2)   |
| O4—Tb4—O27 <sup>i</sup>                | 122.8 (2)  | O7—Tb8—N3   | 129.5 (2)  |
| O4—Tb4—O28 <sup>i</sup>                | 80.2 (3)   | O7—Tb8—O5W  | 75.2 (3)   |
| O4—Tb4—O29 <sup>i</sup>                | 123.5 (3)  | O7—Tb8—O6   | 70.58 (19) |
| O4—Tb4—O31                             | 73.5 (2)   | O7—Tb8—O8   | 74.7 (2)   |
| O27 <sup>i</sup> —Tb4—N5 <sup>i</sup>  | 62.5 (2)   | O7—Tb8—O12  | 94.0 (2)   |
| O28 <sup>i</sup> —Tb4—N5 <sup>i</sup>  | 64.6 (3)   | O7—Tb8—O32  | 66.95 (19) |
| O28 <sup>i</sup> —Tb4—O27 <sup>i</sup> | 120.4 (3)  | O7—Tb8—O33  | 143.9 (3)  |
| O29 <sup>i</sup> —Tb4—N5 <sup>i</sup>  | 66.0 (3)   | O7—Tb8—O34  | 147.0 (3)  |
| O29 <sup>i</sup> —Tb4—O27 <sup>i</sup> | 113.2 (3)  | O8—Tb8—N3   | 79.9 (3)   |
| O29 <sup>i</sup> —Tb4—O28 <sup>i</sup> | 65.1 (5)   | O8—Tb8—O5W  | 135.8 (2)  |
| O31—Tb4—N5 <sup>i</sup>                | 133.0 (2)  | O8—Tb8—O12  | 138.8 (2)  |
| O31—Tb4—O27 <sup>i</sup>               | 142.2 (2)  | O8—Tb8—O32  | 67.2 (2)   |
| O31—Tb4—O28 <sup>i</sup>               | 94.7 (3)   | O8—Tb8—O33  | 140.0 (3)  |
| O31—Tb4—O29 <sup>i</sup>               | 67.0 (3)   | O8—Tb8—O34  | 79.6 (3)   |
| O5—Tb5—O6                              | 74.9 (2)   | O12—Tb8—N3  | 131.9 (3)  |
| O5—Tb5—O9                              | 140.8 (2)  | O12—Tb8—O32 | 144.5 (2)  |
| O5—Tb5—O11                             | 143.1 (2)  | O12—Tb8—O34 | 91.8 (3)   |
| O5—Tb5—O17                             | 66.3 (2)   | O32—Tb8—N3  | 63.1 (2)   |
| O6—Tb5—O11                             | 76.1 (2)   | O33—Tb8—N3  | 66.3 (3)   |
| O6—Tb5—O17                             | 67.2 (2)   | O33—Tb8—O12 | 66.1 (3)   |
| O7—Tb5—C11                             | 67.59 (14) | O33—Tb8—O32 | 111.6 (3)  |

|                                        |            |                        |            |
|----------------------------------------|------------|------------------------|------------|
| O7—Tb5—O5                              | 71.6 (2)   | O33—Tb8—O34            | 67.0 (4)   |
| O7—Tb5—O6                              | 70.47 (19) | O34—Tb8—N3             | 63.7 (3)   |
| O7—Tb5—O9                              | 145.1 (2)  | O34—Tb8—O32            | 120.8 (3)  |
| Symmetry code: (i) $-x+1, y, -z+1/2$ . |            |                        |            |
| <b>3</b>                               |            |                        |            |
| Eu1—O19                                | 2.360 (10) | Eu3—O18                | 2.385 (16) |
| Eu1—O20                                | 2.430 (10) | Eu3—O11                | 2.498 (17) |
| Eu1—O18                                | 2.421 (9)  | Eu3—O16                | 2.422 (14) |
| Eu1—O2W                                | 2.524 (15) | Eu4—Cl1                | 3.208 (3)  |
| Eu1—O9                                 | 2.425 (18) | Eu4—O19                | 2.384 (11) |
| Eu1—O10                                | 3.050 (19) | Eu4—O22                | 2.387 (10) |
| Eu1—O11                                | 3.017 (18) | Eu4—O20                | 2.402 (18) |
| Eu1—O8                                 | 2.488 (18) | Eu4—O21                | 2.420 (15) |
| Eu1—N2A                                | 2.77 (4)   | Eu4—O10 <sup>iii</sup> | 2.534 (14) |
| Eu1—N2                                 | 2.72 (4)   | Eu5—O22                | 2.370 (10) |
| Eu2—O17                                | 2.347 (15) | Eu5—O23 <sup>ii</sup>  | 2.421 (10) |
| Eu2—O1W                                | 2.49 (2)   | Eu5—O21                | 2.434 (9)  |
| Eu2—O15                                | 2.45 (3)   | Eu5—O3W                | 2.507 (14) |
| Eu2—O11 <sup>i</sup>                   | 3.044 (18) | Eu5—O10                | 3.021 (19) |
| Eu2—O11                                | 3.044 (18) | Eu5—O2                 | 2.442 (16) |
| Eu2—O16                                | 2.406 (9)  | Eu5—O5                 | 3.030 (3)  |
| Eu2—O16 <sup>ii</sup>                  | 2.406 (9)  | Eu5—O3                 | 2.479 (16) |
| Eu2—O14                                | 2.50 (2)   | Eu5—N1A                | 2.74 (3)   |
| Eu2—N3 <sup>i</sup>                    | 2.74 (5)   | Eu5—N1                 | 2.72 (4)   |
| Eu2—N3                                 | 2.74 (5)   | Eu6—Cl1                | 3.264 (8)  |
| Eu2—C17 <sup>i</sup>                   | 2.31 (6)   | Eu6—O22 <sup>ii</sup>  | 2.369 (10) |
| Eu3—Cl1                                | 3.227 (6)  | Eu6—O23                | 2.412 (17) |

|             |            |                                            |           |
|-------------|------------|--------------------------------------------|-----------|
| Eu3—O19     | 2.373 (10) | Eu6—O5                                     | 2.46 (2)  |
| Eu3—O17     | 2.368 (9)  | O17—Eu3—O18                                | 142.1 (3) |
| O19—Eu1—O20 | 73.4 (5)   | O17 <sup>ii</sup> —Eu3—O11 <sup>iii</sup>  | 70.7 (5)  |
| O19—Eu1—O18 | 73.0 (5)   | O17 <sup>ii</sup> —Eu3—O11                 | 134.7 (5) |
| O19—Eu1—O2W | 71.6 (5)   | O17—Eu3—O16                                | 72.2 (5)  |
| O19—Eu1—O9  | 149.6 (5)  | O18—Eu3—C11                                | 129.5 (4) |
| O19—Eu1—O10 | 62.8 (3)   | O18—Eu3—O11 <sup>iii</sup>                 | 71.7 (5)  |
| O19—Eu1—O11 | 61.8 (4)   | O18—Eu3—O16                                | 100.6 (5) |
| O19—Eu1—O8  | 142.5 (5)  | O11 <sup>iii</sup> —Eu3—C11                | 119.1 (4) |
| O19—Eu1—N2A | 122.0 (10) | O11 <sup>iii</sup> —Eu3—O11                | 121.8 (8) |
| O19—Eu1—N2  | 122.4 (9)  | O16—Eu3—C11                                | 129.8 (4) |
| O20—Eu1—O2W | 131.2 (5)  | O16—Eu3—O11                                | 72.1 (4)  |
| O20—Eu1—O10 | 62.3 (5)   | O19—Eu4—C11                                | 66.9 (3)  |
| O20—Eu1—O11 | 118.7 (5)  | O19—Eu4—O19 <sup>iii</sup>                 | 72.7 (5)  |
| O20—Eu1—O8  | 135.5 (6)  | O19 <sup>iii</sup> —Eu4—O22                | 134.3 (4) |
| O20—Eu1—N2A | 127.9 (11) | O19—Eu4—O22                                | 89.7 (4)  |
| O20—Eu1—N2  | 72.6 (12)  | O19—Eu4—O20                                | 73.5 (4)  |
| O18—Eu1—O20 | 66.1 (5)   | O19—Eu4—O21                                | 142.0 (3) |
| O18—Eu1—O2W | 130.6 (6)  | O19—Eu4—O10 <sup>iii</sup>                 | 135.4 (5) |
| O18—Eu1—O9  | 82.6 (6)   | O19 <sup>iii</sup> —Eu4—O10 <sup>iii</sup> | 71.6 (4)  |
| O18—Eu1—O10 | 118.8 (4)  | O19 <sup>iii</sup> —Eu4—O10                | 135.4 (5) |
| O18—Eu1—O11 | 62.4 (5)   | O22—Eu4—C11                                | 67.4 (3)  |
| O18—Eu1—O8  | 134.7 (6)  | O22 <sup>iii</sup> —Eu4—O22                | 72.8 (5)  |
| O18—Eu1—N2A | 72.1 (11)  | O22—Eu4—O20                                | 142.0 (3) |
| O18—Eu1—N2  | 128.7 (14) | O22 <sup>iii</sup> —Eu4—O21                | 73.8 (4)  |
| O2W—Eu1—O10 | 71.9 (5)   | O22 <sup>iii</sup> —Eu4—O10 <sup>iii</sup> | 71.0 (5)  |
| O2W—Eu1—O11 | 70.9 (5)   | O22—Eu4—O10 <sup>iii</sup>                 | 134.7 (5) |



|                          |           |                            |           |
|--------------------------|-----------|----------------------------|-----------|
| O2W—Eu1—N2A              | 99.5 (11) | O20—Eu4—C11                | 130.2 (4) |
| O2W—Eu1—N2               | 99.3 (14) | O20—Eu4—O21                | 98.7 (6)  |
| O9—Eu1—O20               | 80.4 (6)  | O20—Eu4—O10                | 71.4 (4)  |
| O9—Eu1—O2W               | 138.7 (6) | O21—Eu4—C11                | 131.2 (4) |
| O9—Eu1—O10               | 117.4 (5) | O21—Eu4—O10                | 70.7 (4)  |
| O9—Eu1—O11               | 121.6 (5) | O10—Eu4—C11                | 119.9 (3) |
| O9—Eu1—O8                | 67.9 (6)  | O10—Eu4—O10 <sup>iii</sup> | 120.2 (7) |
| O9—Eu1—N2A               | 64.3 (10) | O22—Eu5—O23 <sup>ii</sup>  | 73.5 (5)  |
| O9—Eu1—N2                | 61.3 (12) | O22—Eu5—O21                | 73.8 (4)  |
| O11—Eu1—O10              | 120.1 (4) | O22—Eu5—O3W                | 71.9 (4)  |
| O8—Eu1—O2W               | 70.9 (6)  | O22—Eu5—O10                | 62.7 (4)  |
| O8—Eu1—O10               | 105.4 (5) | O22—Eu5—O2                 | 149.5 (5) |
| O8—Eu1—O11               | 104.6 (5) | O22—Eu5—O5                 | 61.4 (5)  |
| O8—Eu1—N2A               | 64.4 (11) | O22—Eu5—O3                 | 142.9 (5) |
| O8—Eu1—N2                | 65.1 (11) | O22—Eu5—N1A                | 122.0 (9) |
| O17—Eu2—O1W              | 72.5 (7)  | O22—Eu5—N1                 | 121.6 (9) |
| O17—Eu2—O15              | 149.1 (7) | O23 <sup>ii</sup> —Eu5—O21 | 66.2 (5)  |
| O17—Eu2—O11              | 61.4 (3)  | O23 <sup>ii</sup> —Eu5—O3W | 131.8 (5) |
| O17—Eu2—O16              | 72.8 (5)  | O23 <sup>ii</sup> —Eu5—O10 | 119.0 (5) |
| O17—Eu2—O14              | 142.4 (7) | O23 <sup>ii</sup> —Eu5—O2  | 80.9 (6)  |
| O1W—Eu2—O11              | 71.3 (4)  | O23 <sup>ii</sup> —Eu5—O5  | 61.8 (6)  |
| O1W—Eu2—O14              | 69.9 (8)  | O23 <sup>ii</sup> —Eu5—O3  | 134.2 (6) |
| O1W—Eu2—N3               | 95.8 (11) | O23 <sup>ii</sup> —Eu5—N1A | 129.7 (9) |
| O15—Eu2—O1W              | 138.3 (9) | O23 <sup>ii</sup> —Eu5—N1  | 72.2 (10) |
| O15—Eu2—O11 <sup>i</sup> | 120.4 (3) | O21—Eu5—O3W                | 131.2 (5) |
| O15—Eu2—O14              | 68.4 (9)  | O21—Eu5—O10                | 62.4 (4)  |
| O15—Eu2—N3               | 64.9 (9)  | O21—Eu5—O2                 | 80.9 (5)  |

|                                         |            |                          |            |
|-----------------------------------------|------------|--------------------------|------------|
| O11 <sup>i</sup> —Eu2—O11               | 118.2 (7)  | O21—Eu5—O5               | 118.0 (6)  |
| O16—Eu2—O1W                             | 131.7 (5)  | O21—Eu5—O3               | 134.8 (5)  |
| O16 <sup>ii</sup> —Eu2—O15              | 81.3 (6)   | O21—Eu5—N1A              | 73.2 (9)   |
| O16 <sup>ii</sup> —Eu2—O11              | 117.8 (5)  | O21—Eu5—N1               | 128.5 (10) |
| O16—Eu2—O11                             | 62.9 (5)   | O3W—Eu5—O10              | 71.5 (5)   |
| O16 <sup>ii</sup> —Eu2—O16              | 65.0 (6)   | O3W—Eu5—O5               | 72.5 (6)   |
| O16 <sup>ii</sup> —Eu2—O14              | 135.7 (5)  | O3W—Eu5—N1A              | 97.2 (9)   |
| O16—Eu2—N3 <sup>i</sup>                 | 131.2 (11) | O3W—Eu5—N1               | 99.0 (10)  |
| O16 <sup>ii</sup> —Eu2—N3 <sup>i</sup>  | 75.6 (10)  | O10—Eu5—O5               | 120.1 (5)  |
| O14—Eu2—O11                             | 105.4 (4)  | O2—Eu5—O3W               | 138.6 (5)  |
| O14—Eu2—N3                              | 62.7 (9)   | O2—Eu5—O10               | 119.3 (5)  |
| N3—Eu2—O11                              | 61.2 (8)   | O2—Eu5—O5                | 119.6 (6)  |
| N3 <sup>i</sup> —Eu2—O11                | 165.4 (11) | O2—Eu5—O3                | 67.6 (6)   |
| N3—Eu2—N3 <sup>i</sup>                  | 115.3 (15) | O2—Eu5—N1A               | 64.2 (10)  |
| C17 <sup>i</sup> —Eu2—O17               | 103.7 (7)  | O2—Eu5—N1                | 63.4 (10)  |
| C17 <sup>i</sup> —Eu2—O1W               | 77.0 (14)  | O3—Eu5—O3W               | 71.0 (5)   |
| C17 <sup>i</sup> —Eu2—O15               | 87.5 (10)  | O3—Eu5—O10               | 105.5 (5)  |
| C17 <sup>i</sup> —Eu2—O11               | 147.8 (14) | O3—Eu5—O5                | 105.8 (6)  |
| C17 <sup>i</sup> —Eu2—O11 <sup>i</sup>  | 42.7 (6)   | O3—Eu5—N1A               | 64.3 (10)  |
| C17 <sup>i</sup> —Eu2—O16 <sup>ii</sup> | 79.6 (13)  | O3—Eu5—N1                | 64.3 (10)  |
| C17 <sup>i</sup> —Eu2—O16               | 144.0 (14) | N1A—Eu5—O10              | 59.9 (9)   |
| C17 <sup>i</sup> —Eu2—O14               | 67.9 (9)   | N1A—Eu5—O5               | 168.1 (10) |
| C17 <sup>i</sup> —Eu2—N3 <sup>i</sup>   | 22.7 (13)  | N1—Eu5—O10               | 168.4 (10) |
| C17 <sup>i</sup> —Eu2—N3                | 129.3 (11) | N1—Eu5—O5                | 61.0 (10)  |
| O19—Eu3—C11                             | 66.6 (3)   | N1—Eu5—N1A               | 116.4 (13) |
| O19 <sup>iii</sup> —Eu3—O19             | 73.0 (5)   | O22—Eu6—C11              | 66.5 (2)   |
| O19—Eu3—O18                             | 73.4 (4)   | O22—Eu6—O22 <sup>i</sup> | 88.1 (5)   |

|                                                                                |            |                                         |            |
|--------------------------------------------------------------------------------|------------|-----------------------------------------|------------|
| O19—Eu3—O11                                                                    | 70.7 (5)   | O22—Eu6—O22 <sup>iii</sup>              | 73.5 (5)   |
| O19 <sup>iii</sup> —Eu3—O11                                                    | 135.2 (5)  | O22—Eu6—O22 <sup>ii</sup>               | 133.0 (5)  |
| O19 <sup>iii</sup> —Eu3—O11 <sup>iii</sup>                                     | 70.7 (5)   | O22 <sup>ii</sup> —Eu6—O23              | 73.7 (4)   |
| O19—Eu3—O16                                                                    | 142.3 (3)  | O22 <sup>i</sup> —Eu6—O23 <sup>ii</sup> | 142.1 (3)  |
| O17—Eu3—Cl1                                                                    | 67.9 (3)   | O22—Eu6—O23                             | 142.1 (3)  |
| O17 <sup>ii</sup> —Eu3—O19                                                     | 134.5 (4)  | O22 <sup>i</sup> —Eu6—O5 <sup>ii</sup>  | 135.8 (3)  |
| O17—Eu3—O19                                                                    | 89.8 (4)   | O22 <sup>i</sup> —Eu6—O5                | 71.2 (4)   |
| O17 <sup>ii</sup> —Eu3—O17                                                     | 72.6 (6)   |                                         |            |
| Symmetry codes: (i) $-x+3/2, y, z$ ; (ii) $-x+3/2, -y, z$ ; (iii) $x, -y, z$ . |            |                                         |            |
| <b>4</b>                                                                       |            |                                         |            |
| Sm1—O1                                                                         | 2.429 (11) | Sm3—O18                                 | 2.507 (19) |
| Sm1—O1W                                                                        | 2.51 (2)   | Sm3—O20                                 | 2.70 (4)   |
| Sm1—N1                                                                         | 2.71 (5)   | Sm4—O4                                  | 2.390 (14) |
| Sm1—O8                                                                         | 2.391 (15) | Sm4—O6                                  | 2.352 (13) |
| Sm1—O9                                                                         | 2.46 (3)   | Sm4—O7                                  | 2.346 (12) |
| Sm1—O10                                                                        | 2.52 (3)   | Sm4—O14A                                | 2.57 (4)   |
| Sm1—O14                                                                        | 2.65 (4)   | Sm4—O20                                 | 2.57 (4)   |
| Sm2—O2                                                                         | 2.40 (2)   | Sm5—O5                                  | 2.428 (9)  |
| Sm2—O7                                                                         | 2.345 (12) | Sm5—O6                                  | 2.395 (11) |
| Sm2—O8                                                                         | 2.355 (11) | Sm5—O14A                                | 2.72 (4)   |
| Sm2—O12                                                                        | 2.54 (4)   | Sm5—O22                                 | 2.429 (15) |
| Sm2—O14                                                                        | 2.64 (4)   | Sm5—O23                                 | 2.486 (17) |
| Sm3—O3                                                                         | 2.423 (9)  | Sm6—O5 <sup>i</sup>                     | 2.366 (17) |
| Sm3—O7                                                                         | 2.382 (12) | Sm6—O6 <sup>i</sup>                     | 2.344 (11) |
| Sm3—O12                                                                        | 2.71 (3)   | Sm6—O19A                                | 2.57 (2)   |
| Sm3—O17                                                                        | 2.452 (18) | O17—Sm3—O2W                             | 138.4 (6)  |
| O1 <sup>i</sup> —Sm1—O1                                                        | 65.8 (8)   | O17—Sm3—N2A                             | 62.1 (10)  |

|                                        |            |                                            |            |
|----------------------------------------|------------|--------------------------------------------|------------|
| O1 <sup>i</sup> —Sm1—O1W               | 131.5 (5)  | O17—Sm3—N2                                 | 63.1 (11)  |
| O1 <sup>i</sup> —Sm1—N1                | 130.5 (13) | O17—Sm3—O12                                | 119.1 (9)  |
| O1—Sm1—N1                              | 74.9 (13)  | O17—Sm3—O18                                | 67.6 (6)   |
| O1 <sup>i</sup> —Sm1—O9                | 80.6 (11)  | O17—Sm3—O20                                | 118.3 (10) |
| O1—Sm1—O9                              | 82.5 (11)  | O18—Sm3—O2W                                | 70.8 (6)   |
| O1—Sm1—O10                             | 135.0 (13) | O18—Sm3—N2A                                | 66.7 (10)  |
| O1 <sup>i</sup> —Sm1—O10               | 136.6 (15) | O18—Sm3—N2                                 | 63.0 (11)  |
| O1 <sup>i</sup> —Sm1—O14               | 121.7 (10) | O18—Sm3—O12                                | 102.0 (10) |
| O1 <sup>i</sup> —Sm1—O14 <sup>ii</sup> | 65.2 (9)   | O18—Sm3—O20                                | 104.8 (10) |
| O1W—Sm1—N1                             | 97.0 (13)  | O3—Sm4—O4                                  | 100.3 (6)  |
| O1W—Sm1—O10                            | 69.2 (9)   | O3—Sm4—O14A                                | 76.5 (9)   |
| O1W—Sm1—O14                            | 69.5 (9)   | O3—Sm4—O20                                 | 66.9 (9)   |
| N1 <sup>ii</sup> —Sm1—N1               | 114 (2)    | O4—Sm4—O14A                                | 65.1 (8)   |
| O8—Sm1—O1                              | 72.7 (5)   | O4—Sm4—O20                                 | 78.2 (8)   |
| O8—Sm1—O1W                             | 72.8 (7)   | O6—Sm4—O3                                  | 143.3 (3)  |
| O8—Sm1—N1                              | 123.1 (10) | O6—Sm4—O4                                  | 74.2 (4)   |
| O8—Sm1—O9                              | 149.1 (9)  | O6 <sup>iii</sup> —Sm4—O6                  | 71.4 (6)   |
| O8—Sm1—O10                             | 142.1 (9)  | O6 <sup>iii</sup> —Sm4—O14A                | 128.5 (9)  |
| O8—Sm1—O14 <sup>ii</sup>               | 64.2 (9)   | O6 <sup>iii</sup> —Sm4—O14A <sup>iii</sup> | 68.2 (9)   |
| O9—Sm1—O1W                             | 137.9 (9)  | O6—Sm4—O20                                 | 76.5 (9)   |
| O9—Sm1—N1                              | 65.0 (18)  | O6—Sm4—O20 <sup>iii</sup>                  | 142.1 (9)  |
| O9—Sm1—N1 <sup>ii</sup>                | 61.9 (18)  | O7—Sm4—O3                                  | 73.9 (5)   |
| O9—Sm1—O10                             | 68.8 (10)  | O7—Sm4—O4                                  | 143.4 (3)  |
| O10—Sm1—N1                             | 62.0 (19)  | O7 <sup>iii</sup> —Sm4—O6 <sup>iii</sup>   | 89.1 (4)   |
| O10—Sm1—N1 <sup>ii</sup>               | 63.8 (19)  | O7 <sup>iii</sup> —Sm4—O6                  | 131.4 (4)  |
| O14—Sm1—O14 <sup>ii</sup>              | 120.9 (18) | O7—Sm4—O7 <sup>iii</sup>                   | 71.0 (6)   |
| O1—Sm2—O2                              | 100.9 (7)  | O7 <sup>iii</sup> —Sm4—O14A                | 142.1 (9)  |

|                                         |            |                              |            |
|-----------------------------------------|------------|------------------------------|------------|
| O1—Sm2—O12                              | 77.1 (8)   | O7—Sm4—O14A                  | 78.5 (8)   |
| O1—Sm2—O14                              | 66.1 (8)   | O7—Sm4—O20                   | 66.2 (8)   |
| O2—Sm2—O12                              | 66.1 (8)   | O7—Sm4—O20 <sup>iii</sup>    | 127.9 (8)  |
| O2—Sm2—O14                              | 79.6 (9)   | O14A—Sm4—O14A <sup>iii</sup> | 116.6 (17) |
| O7—Sm2—O1                               | 143.4 (3)  | O3W—Sm5—N3                   | 99.8 (9)   |
| O7—Sm2—O2                               | 73.7 (5)   | O3W—Sm5—N3A                  | 98.1 (8)   |
| O7 <sup>iii</sup> —Sm2—O7               | 71.0 (6)   | O3W—Sm5—O14A                 | 72.8 (9)   |
| O7 <sup>iii</sup> —Sm2—O8 <sup>i</sup>  | 88.5 (5)   | N3—Sm5—N3A                   | 118.4 (11) |
| O7 <sup>iii</sup> —Sm2—O8               | 131.2 (5)  | O4—Sm5—O3W                   | 131.2 (5)  |
| O7—Sm2—O8                               | 88.5 (5)   | O4—Sm5—N3                    | 71.6 (9)   |
| O7 <sup>iii</sup> —Sm2—O12              | 128.3 (8)  | O4—Sm5—N3A                   | 128.8 (8)  |
| O7—Sm2—O12                              | 67.6 (8)   | O4—Sm5—O5                    | 65.9 (5)   |
| O7—Sm2—O14                              | 77.4 (9)   | O4—Sm5—O14A                  | 62.4 (9)   |
| O7—Sm2—O14 <sup>iii</sup>               | 143.1 (9)  | O4—Sm5—O22                   | 80.9 (5)   |
| O8 <sup>i</sup> —Sm2—O1                 | 74.4 (5)   | O4—Sm5—O23                   | 134.6 (6)  |
| O8 <sup>i</sup> —Sm2—O2                 | 143.0 (4)  | O5—Sm5—O3W                   | 130.1 (6)  |
| O8 <sup>i</sup> —Sm2—O8                 | 72.3 (8)   | O5—Sm5—N3                    | 128.4 (9)  |
| O8—Sm2—O12 <sup>iii</sup>               | 142.6 (8)  | O5—Sm5—N3A                   | 72.3 (9)   |
| O8 <sup>i</sup> —Sm2—O12 <sup>iii</sup> | 77.2 (8)   | O5—Sm5—O14A                  | 120.1 (8)  |
| O8—Sm2—O14                              | 64.8 (10)  | O5—Sm5—O22                   | 80.2 (6)   |
| O8—Sm2—O14 <sup>iii</sup>               | 127.4 (9)  | O5—Sm5—O23                   | 135.5 (6)  |
| O12—Sm2—O12 <sup>iii</sup>              | 118.9 (17) | O6—Sm5—O3W                   | 71.5 (5)   |
| O14—Sm2—O14 <sup>iii</sup>              | 122.3 (17) | O6—Sm5—N3                    | 120.6 (8)  |
| O2W—Sm3—N2A                             | 98.8 (11)  | O6—Sm5—N3A                   | 121.0 (8)  |
| O2W—Sm3—N2                              | 100.1 (11) | O6—Sm5—O4                    | 72.9 (5)   |
| O2W—Sm3—O12                             | 72.1 (9)   | O6—Sm5—O5                    | 72.8 (5)   |
| O2W—Sm3—O20                             | 69.9 (9)   | O6—Sm5—O14A                  | 65.2 (8)   |

|             |            |                             |            |
|-------------|------------|-----------------------------|------------|
| O2—Sm3—O2W  | 132.0 (6)  | O6—Sm5—O22                  | 148.1 (5)  |
| O2—Sm3—N2A  | 127.7 (11) | O6—Sm5—O23                  | 143.1 (6)  |
| O2—Sm3—N2   | 72.6 (12)  | O14A—Sm5—N3                 | 56.6 (11)  |
| O2—Sm3—O3   | 65.1 (5)   | O14A—Sm5—N3A                | 167.4 (11) |
| O2—Sm3—O12  | 63.3 (9)   | O22—Sm5—O3W                 | 140.4 (6)  |
| O2—Sm3—O17  | 81.8 (7)   | O22—Sm5—N3                  | 65.2 (9)   |
| O2—Sm3—O18  | 133.7 (6)  | O22—Sm5—N3A                 | 63.8 (8)   |
| O2—Sm3—O20  | 120.4 (10) | O22—Sm5—O14A                | 117.7 (9)  |
| N2A—Sm3—N2  | 115.5 (13) | O22—Sm5—O23                 | 68.8 (6)   |
| O3—Sm3—O2W  | 131.0 (6)  | O23—Sm5—O3W                 | 71.6 (6)   |
| O3—Sm3—N2A  | 72.5 (10)  | O23—Sm5—N3                  | 65.3 (10)  |
| O3—Sm3—N2   | 127.6 (12) | O23—Sm5—N3A                 | 65.8 (9)   |
| O3—Sm3—O12  | 119.6 (10) | O23—Sm5—O14A                | 102.6 (9)  |
| O3—Sm3—O17  | 81.1 (6)   | O5 <sup>i</sup> —Sm6—O5     | 100.2 (8)  |
| O3—Sm3—O18  | 136.7 (6)  | O5—Sm6—O19A                 | 77.9 (6)   |
| O3—Sm3—O20  | 64.2 (9)   | O5 <sup>i</sup> —Sm6—O19A   | 65.6 (6)   |
| O7—Sm3—O2W  | 72.5 (5)   | O6—Sm6—O5 <sup>i</sup>      | 143.2 (3)  |
| O7—Sm3—O2   | 72.9 (6)   | O6—Sm6—O5                   | 74.8 (4)   |
| O7—Sm3—N2A  | 121.8 (9)  | O6 <sup>i</sup> —Sm6—O5     | 143.2 (3)  |
| O7—Sm3—N2   | 122.7 (10) | O6—Sm6—O6 <sup>ii</sup>     | 87.8 (6)   |
| O7—Sm3—O3   | 72.5 (5)   | O6—Sm6—O6 <sup>iii</sup>    | 71.7 (6)   |
| O7—Sm3—O12  | 64.3 (9)   | O6—Sm6—O6 <sup>i</sup>      | 130.3 (5)  |
| O7—Sm3—O17  | 149.1 (6)  | O6—Sm6—O19A                 | 77.9 (7)   |
| O7—Sm3—O18  | 143.3 (5)  | O6 <sup>ii</sup> —Sm6—O19A  | 66.8 (7)   |
| O7—Sm3—O20  | 63.6 (10)  | O6 <sup>i</sup> —Sm6—O19A   | 128.2 (7)  |
| O12—Sm3—N2A | 167.7 (13) | O6 <sup>iii</sup> —Sm6—O19A | 143.3 (7)  |
| O12—Sm3—N2  | 59.7 (13)  |                             |            |

| Symmetry codes: (i) $-x+1/2, -y+1, z$ ; (ii) $-x+1/2, y, z$ ; (iii) $x, -y+1, z$ . |            |                      |            |
|------------------------------------------------------------------------------------|------------|----------------------|------------|
| <b>5</b>                                                                           |            |                      |            |
| Ho1—O2                                                                             | 2.470 (8)  | Ho5—O5               | 2.372 (7)  |
| Ho1—O5                                                                             | 2.341 (7)  | Ho5—O11              | 2.390 (8)  |
| Ho1—O7                                                                             | 2.300 (6)  | Ho5—O12              | 2.371 (7)  |
| Ho1—O17                                                                            | 2.347 (7)  | Ho5—O15              | 2.416 (7)  |
| Ho2—Cl4                                                                            | 3.216 (7)  | Ho5—O17 <sup>i</sup> | 2.400 (7)  |
| Ho2—O5                                                                             | 2.299 (6)  | Ho5—O28              | 2.425 (10) |
| Ho2—O6                                                                             | 2.475 (7)  | Ho6—N2 <sup>i</sup>  | 2.516 (12) |
| Ho2—O7                                                                             | 2.330 (6)  | Ho6—O6 <sup>i</sup>  | 2.440 (7)  |
| Ho2—O8                                                                             | 2.336 (7)  | Ho6—O7 <sup>i</sup>  | 2.388 (6)  |
| Ho2—O10                                                                            | 2.489 (7)  | Ho6—O12 <sup>i</sup> | 2.404 (6)  |
| Ho2—O12                                                                            | 2.360 (7)  | Ho6—O16              | 2.413 (8)  |
| Ho2—O34                                                                            | 2.288 (7)  | Ho6—O17              | 2.352 (7)  |
| Ho3—O3 <sup>i</sup>                                                                | 2.469 (7)  | Ho6—O22 <sup>i</sup> | 2.398 (10) |
| Ho3—Cl4                                                                            | 3.136 (17) | Ho6—O24 <sup>i</sup> | 2.422 (9)  |
| Ho3—O4                                                                             | 2.505 (7)  | Ho7—O9               | 2.360 (7)  |
| Ho3—O8                                                                             | 2.299 (7)  | Ho7—O13              | 2.400 (8)  |
| Ho3—O9                                                                             | 2.285 (6)  | Ho7—O20              | 2.352 (7)  |
| Ho3—O9 <sup>i</sup>                                                                | 2.337 (7)  | Ho7—O20 <sup>i</sup> | 2.409 (7)  |
| Ho3—O20                                                                            | 2.358 (7)  | Ho7—O21              | 2.357 (9)  |
| Ho3—O34                                                                            | 2.336 (7)  | Ho7—O25              | 2.428 (10) |
| Ho3—O35                                                                            | 2.364 (7)  | Ho8—O8               | 2.359 (7)  |
| Ho4—O4                                                                             | 2.424 (8)  | Ho8—O10              | 2.452 (7)  |
| Ho4—O19                                                                            | 2.390 (8)  | Ho8—O14              | 2.376 (11) |
| Ho4—O23                                                                            | 2.380 (8)  | Ho8—O18 <sup>i</sup> | 2.401 (8)  |
| Ho4—O26                                                                            | 2.425 (8)  | Ho8—O29              | 2.435 (10) |

|                           |           |                           |           |
|---------------------------|-----------|---------------------------|-----------|
| Ho4—O34                   | 2.359 (6) | Ho8—O35                   | 2.345 (7) |
| Ho4—O35                   | 2.414 (7) | O11—Ho5—N4                | 66.4 (3)  |
| O2 <sup>i</sup> —Ho1—O2   | 124.4 (3) | O11—Ho5—O15               | 86.4 (3)  |
| O5—Ho1—O2 <sup>i</sup>    | 143.5 (2) | O11—Ho5—O17 <sup>i</sup>  | 80.5 (3)  |
| O5—Ho1—O2                 | 66.6 (2)  | O11—Ho5—O28               | 70.7 (4)  |
| O5 <sup>i</sup> —Ho1—O5   | 128.2 (3) | O12—Ho5—O2                | 123.8 (2) |
| O5—Ho1—O17                | 140.8 (2) | O12—Ho5—O3W               | 125.6 (3) |
| O5 <sup>i</sup> —Ho1—O17  | 76.6 (2)  | O12—Ho5—N4                | 132.7 (3) |
| O7—Ho1—O2                 | 127.8 (2) | O12—Ho5—O5                | 71.1 (2)  |
| O7 <sup>i</sup> —Ho1—O2   | 78.5 (2)  | O12—Ho5—O11               | 77.9 (2)  |
| O7 <sup>i</sup> —Ho1—O5   | 87.1 (2)  | O12—Ho5—O15               | 73.5 (2)  |
| O7—Ho1—O5                 | 70.3 (3)  | O12—Ho5—O17 <sup>i</sup>  | 65.8 (2)  |
| O7—Ho1—O7 <sup>i</sup>    | 127.3 (3) | O12—Ho5—O28               | 131.6 (4) |
| O7—Ho1—O17                | 148.1 (2) | O15—Ho5—O2                | 144.8 (2) |
| O7 <sup>i</sup> —Ho1—O17  | 72.7 (2)  | O15—Ho5—O3W               | 73.4 (3)  |
| O17 <sup>i</sup> —Ho1—O2  | 69.9 (2)  | O15—Ho5—N4                | 130.7 (3) |
| O17—Ho1—O2                | 76.4 (2)  | O15—Ho5—O28               | 68.8 (3)  |
| O17 <sup>i</sup> —Ho1—O17 | 103.1 (4) | O17 <sup>i</sup> —Ho5—O2  | 69.1 (2)  |
| O1—Ho2—Cl4                | 127.6 (4) | O17 <sup>i</sup> —Ho5—O3W | 136.2 (3) |
| O1—Ho2—O6                 | 77.2 (2)  | O17 <sup>i</sup> —Ho5—N4  | 78.2 (3)  |
| O1—Ho2—O10                | 68.3 (2)  | O17 <sup>i</sup> —Ho5—O15 | 139.0 (2) |
| O1—Ho2—O12                | 101.0 (2) | O17 <sup>i</sup> —Ho5—O28 | 139.0 (3) |
| O5—Ho2—O1                 | 146.2 (2) | O28—Ho5—O2                | 104.4 (4) |
| O5—Ho2—Cl4                | 66.6 (3)  | O28—Ho5—O3W               | 70.1 (4)  |
| O5—Ho2—O6                 | 126.7 (2) | O28—Ho5—N4                | 63.9 (3)  |
| O5—Ho2—O7                 | 70.5 (3)  | O2W—Ho6—N2 <sup>i</sup>   | 103.3 (4) |
| O5—Ho2—O8                 | 88.6 (2)  | O6 <sup>i</sup> —Ho6—O2W  | 72.3 (3)  |



|                          |             |                                        |           |
|--------------------------|-------------|----------------------------------------|-----------|
| O5—Ho2—O10               | 78.0 (2)    | O6 <sup>i</sup> —Ho6—N2 <sup>i</sup>   | 64.0 (3)  |
| O5—Ho2—O12               | 72.5 (2)    | O7 <sup>i</sup> —Ho6—O2W               | 70.4 (3)  |
| O6—Ho2—O10               | 123.8 (2)   | O7 <sup>i</sup> —Ho6—N2 <sup>i</sup>   | 129.0 (3) |
| O7—Ho2—O1                | 141.8 (2)   | O7 <sup>i</sup> —Ho6—O6 <sup>i</sup>   | 66.2 (2)  |
| O7—Ho2—O6                | 66.5 (2)    | O7 <sup>i</sup> —Ho6—O12 <sup>i</sup>  | 74.9 (2)  |
| O7—Ho2—O8                | 129.4 (2)   | O7 <sup>i</sup> —Ho6—O16               | 97.1 (2)  |
| O7—Ho2—O10               | 143.4 (2)   | O7 <sup>i</sup> —Ho6—O22 <sup>i</sup>  | 147.4 (3) |
| O7—Ho2—O12               | 76.8 (2)    | O7 <sup>i</sup> —Ho6—O24 <sup>i</sup>  | 140.2 (3) |
| O8—Ho2—O1                | 75.8 (2)    | O12 <sup>i</sup> —Ho6—O2W              | 135.3 (3) |
| O8—Ho2—O6                | 143.7 (2)   | O12 <sup>i</sup> —Ho6—N2 <sup>i</sup>  | 77.7 (3)  |
| O8—Ho2—O10               | 66.1 (2)    | O12 <sup>i</sup> —Ho6—O6 <sup>i</sup>  | 68.3 (2)  |
| O8—Ho2—O12               | 140.8 (2)   | O12 <sup>i</sup> —Ho6—O16              | 139.8 (2) |
| O12—Ho2—Cl4              | 131.3 (4)   | O12 <sup>i</sup> —Ho6—O24 <sup>i</sup> | 138.5 (3) |
| O10—Ho2—Cl4              | 117.95 (18) | O16—Ho6—O2W                            | 72.9 (3)  |
| O12—Ho2—O6               | 68.4 (2)    | O16—Ho6—N2 <sup>i</sup>                | 130.4 (3) |
| O12—Ho2—O10              | 76.3 (2)    | O16—Ho6—O6 <sup>i</sup>                | 144.8 (2) |
| O34—Ho2—O1               | 72.4 (2)    | O16—Ho6—O24 <sup>i</sup>               | 70.3 (3)  |
| O34—Ho2—Cl4              | 63.9 (3)    | O17—Ho6—O2W                            | 124.6 (3) |
| O34—Ho2—O5               | 130.5 (2)   | O17—Ho6—N2 <sup>i</sup>                | 132.0 (3) |
| O34—Ho2—O6               | 78.5 (2)    | O17—Ho6—O6 <sup>i</sup>                | 123.4 (2) |
| O34—Ho2—O7               | 88.7 (2)    | O17—Ho6—O7 <sup>i</sup>                | 71.1 (2)  |
| O34—Ho2—O8               | 70.4 (3)    | O17—Ho6—O12 <sup>i</sup>               | 66.1 (2)  |
| O34—Ho2—O10              | 126.7 (2)   | O17—Ho6—O16                            | 74.0 (3)  |
| O34—Ho2—O12              | 146.9 (2)   | O17—Ho6—O22 <sup>i</sup>               | 78.5 (3)  |
| O3 <sup>i</sup> —Ho3—Cl4 | 118.20 (17) | O17—Ho6—O24 <sup>i</sup>               | 134.3 (3) |
| O3 <sup>i</sup> —Ho3—O4  | 123.2 (2)   | O22 <sup>i</sup> —Ho6—O2W              | 139.8 (3) |
| O4—Ho3—Cl4               | 118.58 (17) | O22 <sup>i</sup> —Ho6—N2 <sup>i</sup>  | 65.9 (4)  |

|                                      |           |                                        |           |
|--------------------------------------|-----------|----------------------------------------|-----------|
| O8—Ho3—O3 <sup>i</sup>               | 78.9 (3)  | O22 <sup>i</sup> —Ho6—O6 <sup>i</sup>  | 125.8 (3) |
| O8—Ho3—Cl4                           | 65.6 (2)  | O22 <sup>i</sup> —Ho6—O12 <sup>i</sup> | 82.3 (3)  |
| O8—Ho3—O4                            | 126.3 (2) | O22 <sup>i</sup> —Ho6—O16              | 85.4 (3)  |
| O8—Ho3—O9 <sup>i</sup>               | 89.7 (2)  | O22 <sup>i</sup> —Ho6—O24 <sup>i</sup> | 71.2 (3)  |
| O8—Ho3—O20                           | 147.4 (2) | O24 <sup>i</sup> —Ho6—O2W              | 69.8 (3)  |
| O8—Ho3—O34                           | 70.2 (3)  | O24 <sup>i</sup> —Ho6—N2 <sup>i</sup>  | 62.7 (4)  |
| O9—Ho3—O3 <sup>i</sup>               | 126.8 (2) | O24 <sup>i</sup> —Ho6—O6 <sup>i</sup>  | 102.1 (3) |
| O9 <sup>i</sup> —Ho3—O3 <sup>i</sup> | 66.1 (2)  | O3—Ho7—N5                              | 63.3 (3)  |
| O9 <sup>i</sup> —Ho3—Cl4             | 64.9 (2)  | O5W—Ho7—O3                             | 72.2 (3)  |
| O9—Ho3—Cl4                           | 65.4 (2)  | O5W—Ho7—N5                             | 100.0 (3) |
| O9 <sup>i</sup> —Ho3—O4              | 143.1 (2) | O5W—Ho7—O25                            | 69.6 (4)  |
| O9—Ho3—O4                            | 77.9 (2)  | O9—Ho7—O3                              | 65.7 (2)  |
| O9—Ho3—O8                            | 131.0 (2) | O9—Ho7—O5W                             | 72.2 (3)  |
| O9—Ho3—O9 <sup>i</sup>               | 70.9 (3)  | O9—Ho7—N5                              | 128.2 (3) |
| O9 <sup>i</sup> —Ho3—O20             | 75.8 (2)  | O9—Ho7—O13                             | 97.4 (2)  |
| O9—Ho3—O20                           | 71.8 (2)  | O9—Ho7—O20 <sup>i</sup>                | 74.4 (2)  |
| O9—Ho3—O34                           | 88.2 (2)  | O9—Ho7—O25                             | 141.6 (4) |
| O9 <sup>i</sup> —Ho3—O35             | 141.5 (2) | O13—Ho7—O3                             | 145.6 (3) |
| O9—Ho3—O35                           | 145.9 (2) | O13—Ho7—O5W                            | 74.1 (3)  |
| O20—Ho3—O3 <sup>i</sup>              | 68.6 (2)  | O13—Ho7—N5                             | 130.6 (3) |
| O20—Ho3—Cl4                          | 128.8 (3) | O13—Ho7—O20 <sup>i</sup>               | 139.2 (3) |
| O20—Ho3—O4                           | 76.1 (2)  | O13—Ho7—O25                            | 68.8 (3)  |
| O20—Ho3—O35                          | 101.5 (3) | O20 <sup>i</sup> —Ho7—O3               | 67.8 (2)  |
| O34—Ho3—O3 <sup>i</sup>              | 144.0 (2) | O20—Ho7—O3                             | 122.6 (2) |
| O34—Ho3—Cl4                          | 65.0 (2)  | O20 <sup>i</sup> —Ho7—O5W              | 135.6 (3) |
| O34—Ho3—O4                           | 66.5 (2)  | O20—Ho7—O5W                            | 126.1 (3) |
| O34—Ho3—O9 <sup>i</sup>              | 129.9 (2) | O20 <sup>i</sup> —Ho7—N5               | 78.6 (3)  |

|                         |           |                           |           |
|-------------------------|-----------|---------------------------|-----------|
| O34—Ho3—O20             | 140.6 (2) | O20—Ho7—N5                | 133.7 (3) |
| O34—Ho3—O35             | 76.2 (2)  | O20—Ho7—O9                | 70.6 (2)  |
| O35—Ho3—O3 <sup>i</sup> | 77.1 (2)  | O20—Ho7—O13               | 73.5 (3)  |
| O35—Ho3—Cl4             | 129.6 (3) | O20—Ho7—O20 <sup>i</sup>  | 66.0 (3)  |
| O35—Ho3—O4              | 68.1 (2)  | O20—Ho7—O21               | 79.1 (3)  |
| O1W—Ho4—N1              | 104.2 (3) | O20 <sup>i</sup> —Ho7—O25 | 139.2 (3) |
| O1—Ho4—O1W              | 125.6 (3) | O20—Ho7—O25               | 132.2 (4) |
| O1—Ho4—N1               | 130.0 (3) | O21—Ho7—O3                | 124.2 (3) |
| O1—Ho4—O4               | 123.6 (2) | O21—Ho7—O5W               | 139.8 (4) |
| O1—Ho4—O19              | 74.8 (3)  | O21—Ho7—N5                | 66.1 (3)  |
| O1—Ho4—O23              | 77.8 (3)  | O21—Ho7—O9                | 146.6 (3) |
| O1—Ho4—O26              | 136.1 (3) | O21—Ho7—O13               | 86.9 (3)  |
| O1—Ho4—O35              | 65.1 (2)  | O21—Ho7—O20 <sup>i</sup>  | 80.8 (3)  |
| O4—Ho4—O1W              | 72.1 (3)  | O21—Ho7—O25               | 70.6 (4)  |
| O4—Ho4—N1               | 64.8 (3)  | O25—Ho7—O3                | 105.1 (3) |
| O4—Ho4—O26              | 100.2 (3) | O25—Ho7—N5                | 63.5 (3)  |
| O19—Ho4—O1W             | 73.6 (3)  | O1—Ho8—N3                 | 78.6 (3)  |
| O19—Ho4—N1              | 129.1 (3) | O1—Ho8—O4W                | 135.2 (3) |
| O19—Ho4—O4              | 145.5 (2) | O1—Ho8—O10                | 68.1 (3)  |
| O19—Ho4—O26             | 70.5 (3)  | O1—Ho8—O18 <sup>i</sup>   | 140.0 (3) |
| O19—Ho4—O35             | 139.6 (3) | O1—Ho8—O29                | 139.6 (3) |
| O23—Ho4—O1W             | 137.6 (3) | O4W—Ho8—N3                | 101.0 (3) |
| O23—Ho4—N1              | 66.5 (4)  | O4W—Ho8—O10               | 71.7 (3)  |
| O23—Ho4—O4              | 128.3 (3) | O8—Ho8—O1                 | 74.4 (2)  |
| O23—Ho4—O19             | 81.4 (4)  | O8—Ho8—N3                 | 129.4 (3) |
| O23—Ho4—O26             | 71.2 (3)  | O8—Ho8—O4W                | 72.0 (3)  |
| O23—Ho4—O35             | 85.1 (3)  | O8—Ho8—O10                | 66.4 (2)  |

|                                        |           |                           |           |
|----------------------------------------|-----------|---------------------------|-----------|
| O26—Ho4—O1W                            | 68.4 (3)  | O8—Ho8—O14                | 147.3 (3) |
| O26—Ho4—N1                             | 62.4 (3)  | O8—Ho8—O18 <sup>i</sup>   | 96.9 (2)  |
| O34—Ho4—O1W                            | 70.9 (3)  | O8—Ho8—O29                | 141.9 (3) |
| O34—Ho4—O1                             | 70.5 (2)  | O10—Ho8—N3                | 64.0 (3)  |
| O34—Ho4—N1                             | 130.9 (3) | O14—Ho8—O1                | 82.6 (3)  |
| O34—Ho4—O4                             | 67.5 (2)  | O14—Ho8—N3                | 65.8 (4)  |
| O34—Ho4—O19                            | 97.4 (2)  | O14—Ho8—O4W               | 138.7 (4) |
| O34—Ho4—O23                            | 147.4 (3) | O14—Ho8—O10               | 125.5 (3) |
| O34—Ho4—O26                            | 139.3 (3) | O14—Ho8—O18 <sup>i</sup>  | 85.9 (3)  |
| O34—Ho4—O35                            | 74.8 (2)  | O14—Ho8—O29               | 69.0 (4)  |
| O35—Ho4—N1                             | 77.7 (3)  | O18 <sup>i</sup> —Ho8—N3  | 130.0 (3) |
| O35—Ho4—O4                             | 68.7 (2)  | O18 <sup>i</sup> —Ho8—O4W | 73.3 (3)  |
| O35—Ho4—O26                            | 139.0 (2) | O18 <sup>i</sup> —Ho8—O10 | 144.4 (3) |
| O2—Ho5—N4                              | 63.5 (3)  | O18 <sup>i</sup> —Ho8—O29 | 67.7 (3)  |
| O3W—Ho5—O2                             | 71.9 (3)  | O29—Ho8—N3                | 64.0 (3)  |
| O3W—Ho5—N4                             | 101.6 (3) | O29—Ho8—O4W               | 70.2 (4)  |
| O5—Ho5—O2                              | 66.3 (2)  | O29—Ho8—O10               | 105.4 (3) |
| O5—Ho5—O3W                             | 71.6 (3)  | O35—Ho8—O1                | 65.9 (2)  |
| O5—Ho5—N4                              | 128.7 (3) | O35—Ho8—N3                | 132.1 (3) |
| O5—Ho5—O11                             | 146.3 (3) | O35—Ho8—O4W               | 126.7 (3) |
| O5—Ho5—O15                             | 97.0 (2)  | O35—Ho8—O8                | 71.3 (2)  |
| O5—Ho5—O17 <sup>i</sup>                | 75.0 (2)  | O35—Ho8—O10               | 123.7 (2) |
| O5—Ho5—O28                             | 141.5 (4) | O35—Ho8—O14               | 78.3 (3)  |
| O11—Ho5—O2                             | 125.2 (3) | O35—Ho8—O18 <sup>i</sup>  | 74.3 (3)  |
| O11—Ho5—O3W                            | 140.2 (3) | O35—Ho8—O29               | 130.6 (4) |
| Symmetry code: (i) $x, -y+1/2, -z+1$ . |           |                           |           |
